# A Systematic Review and Meta-Analysis of Digital Application use in Clinical Research in Pain Medicine

1 Ashish Shetty<sup>2\*\*</sup>, Gayathri Delanerolle<sup>1\*\*</sup>, Yutian Zeng<sup>8,9\*\*\*</sup>, Jian Qing Shi<sup>8,9\*\*\*\*</sup>, Rawan  
2 Ebrahim<sup>3</sup>, Joanna Pang<sup>4</sup>, Dharani Hapangama<sup>6</sup>, Martin Sillem<sup>13</sup>, Suchith Shetty<sup>18</sup>,  
3 Balakrishnan Shetty<sup>15</sup>, Martin Hirsch<sup>10,3</sup>, Vanessa Raymont<sup>17</sup>, Kingshuk Majumder<sup>7</sup>, Sam  
4 Chong<sup>2,3</sup>, William Goodison<sup>2</sup>, Rebecca O'Hara<sup>11</sup>, Louise Hull<sup>11</sup>, Nicola Pluchino<sup>12</sup>, Naresh  
5 Shetty<sup>14</sup>, Sohier Elneil<sup>2,3\*\*\*\*</sup>, Tacson Fernandez<sup>3,16</sup>, \*Peter Phiri<sup>4,5\*\*\*\*</sup>, Robert  
6 Brownstone<sup>2,3\*\*\*\*</sup>

7 <sup>1</sup>University of Oxford, Oxford, UK

8 <sup>2</sup>University College London Hospitals NHS Foundation Trust, London, UK

9 <sup>3</sup>University College London, London, UK

10 <sup>4</sup>Southern Health NHS Foundation Trust, Southampton, UK

11 <sup>5</sup>University of Southampton, Primary Care, Population Sciences and Medical Education Division,  
12 Southampton, UK

13 <sup>6</sup>Liverpool Women's NHS Foundation, Liverpool, UK

14 <sup>7</sup>University of Manchester NHS Foundation Trust, Manchester, UK

15 <sup>8</sup>Southern University of Science and Technology, Shenzhen, China

16 <sup>9</sup>Alan Turing Institute, London, UK

17 <sup>10</sup>Oxford University Hospitals NHS Foundation Trust, Oxford, UK

18 <sup>11</sup>Robinson Research Institute, University of Adelaide, Adelaide, Australia

19 <sup>12</sup>University of Geneva, Geneva, Switzerland

20 <sup>13</sup>Praxisklinik am Rosengarten Mannheim, Saarland University Medical Centre, Homburg, Germany

21 <sup>14</sup>M.S. Ramaiah Medical College, Bangalore, India

22 <sup>15</sup>Sri Siddhartha University, Tumkur, India

23 <sup>16</sup>Royal National Orthopaedic Hospital, London, UK

24 <sup>17</sup>Department of Psychiatry, University of Oxford, Oxford, UK

25 <sup>18</sup>Eötvös Loránd University, Budapest, Hungary

26 \*\*These authors share first authorship

27 \*\*\*These authors share second authorship

28 \*\*\*\*These authors share last authorship

29 \* **Correspondence:**

30 Dr Peter Phiri

31 [Peter.Phiri@southernhealth.nhs.uk](mailto:Peter.Phiri@southernhealth.nhs.uk)

32 This submission is formatted in British English.

33

34 **Keywords: chronic pain, pain management, digital app, digital medicine, mHealth**

35

36

37 **Abstract**

38 *Importance*

39 Pain is a silent global epidemic impacting approximately a third of the population. Pharmacological  
40 and surgical interventions are primary modes of treatment. Cognitive/behavioural management  
41 approaches and interventional pain management strategies are approaches that have been used to  
42 assist with the management of chronic pain. Accurate data collection and reporting treatment  
43 outcomes are vital to addressing the challenges faced. In light of this, we conducted a systematic  
44 evaluation of the current digital application landscape within chronic pain medicine.

45 *Objective*

46 The primary objective was to consider the prevalence of digital application usage for chronic pain  
47 management. These digital applications included mobile apps, web apps, and chatbots.

48 *Data Sources*

49 We conducted searches on PubMed and ScienceDirect for studies that were published between 1st  
50 January 1990 and 1st January 2021.

51 *Study Selection*

52 Our review included studies that involved the use of digital applications for chronic pain conditions.  
53 There were no restrictions on the country in which the study was conducted. Only studies that were  
54 peer-reviewed and published in English were included. Four reviewers had assessed the eligibility of  
55 each study against the inclusion/exclusion criteria. Out of the 84 studies that were initially identified,  
56 38 were included in the systematic review.

57 *Data Extraction and Synthesis*

58 The AMSTAR guidelines were used to assess data quality. This assessment was carried out by 3  
59 reviewers. The data were pooled using a random-effects model.

60 *Main Outcome(s) and Measure(s)*

61 Before data collection began, the primary outcome was to report on the prevalence of digital  
62 application usage for chronic pain conditions. We also recorded the type of digital application studied  
63 (e.g. mobile application, web application) and, where the data was available, the prevalence of pain  
64 intensity, pain inferences, depression, anxiety, and fatigue.

65 *Results*

66 38 studies were included in the systematic review and 22 studies were included in the meta-analysis.

67 The digital interventions were categorised to web and mobile applications and chatbots, with pooled  
68 prevalence of 0.22 (95% CI -0.16, 0.60), 0.30 (95% CI 0.00, 0.60) and -0.02 (95% CI -0.47, 0.42)  
69 respectively. Pooled standard mean differences for symptomatology of pain intensity, depression,  
70 and anxiety symptoms were 0.25 (95% CI 0.03, 0.46), 0.30 (95% CI 0.17, 0.43) and 0.37 (95% CI  
71 0.05, 0.69) respectively.

72 A sub-group analysis was conducted on pain intensity due to the heterogeneity of the results  
73 ( $I^2=82.86\%$ ;  $p=0.02$ ). After stratifying by country, we found that digital applications were more  
74 likely to be effective in some countries (e.g. USA, China) than others (e.g. Ireland, Norway).

75

76 *Conclusions and Relevance*

77 The use of digital applications in improving pain-related symptoms shows promise, but further  
78 clinical studies would be needed to develop more robust applications.

79

80 **Introduction**

81 High-quality research data generated by scientifically robust study designs, improved use of clinical  
82 data, and the development of cost-effective healthcare models can change how medicine is practiced  
83 in the modern world. Digital medicine (DM), wherein multimodal and multidimensional digital tools  
84 are used to intervene in accessing and providing healthcare, is now a fundamental part of these  
85 drivers of change.

86 Despite relative growth profoundly impacting gross economic improvement, ‘*bench to bedside*’  
87 pathways still take considerable time ( ). Equally robust research evaluations have not kept pace with  
88 a growing global population, although, the intellectual and healthcare evolution has modernised  
89 clinical practice by way of clinical research. Existing clinical evidence and incorporation of  
90 information technology has led to more prominent use of DM. A fundamental aspect of DM is to  
91 improve and promote evidence-based medicine (EBM) and/or evidence-based practices (EBP) within  
92 clinical and healthcare frameworks, underpinned by data science and technologies.

93 The field of pain medicine in adults is a particularly challenging area of clinical practice for many  
94 reasons, including subjectivity associated with patient-reported outcomes and management of  
95 symptomatology with limited information on pathophysiology ( ). Considering this uncertainty,  
96 attempts by clinicians to categorise pain and decide on treatment interventions (Supplementary Table  
97 1), could benefit from the concepts of DM and its associates of EBM and EBP. Pain is often the  
98 commonest symptom that patients present with in outpatient clinics. The need for individualised care  
99 based on generalisable research is complicated by wide variables, subjective nature, and inherent bias  
100 which provide a unique set of challenges for a simple protocol to work. The use of cognitive  
101 technology such as artificial intelligence, in delivering personalised care, based on available  
102 evidence, is therefore an attractive proposition for pain medicine.

103 [SUPPLEMENTARY TABLE 1]

104 Pain medicine has been identified as a specialty that would vastly benefit from the personalisation of  
105 care.<sup>1</sup> A current example of this need is the variable efficacy of pharmacotherapy in relieving chronic  
106 pain. Opioids, for instance, have been routinely used to treat chronic pain syndromes, despite only  
107 modest evidence for their use.<sup>2</sup> This has the potential for significant harm in patients where it has  
108 been used inappropriately and may have influenced factors that led to the Opioid Crisis globally,  
109 especially so in the USA and UK. Traditional pain evaluation methods are vulnerable to recall error  
110 and bias as they rely on retrospective reporting of pain variations.<sup>3</sup> Pain perception combined with  
111 measuring functional changes and physiological parameters affected by pain are important secondary  
112 outcome data to assess efficacy. Methods demanding frequent, repeated pain evaluation and pain-  
113 associated features are required to formulate chronic pain management strategies.<sup>4,5</sup> This approach  
114 was previously hindered both by the resources required for such vast data collection, and the  
115 complexity of the statistical analysis required to interpret the resulting datasets.<sup>6</sup>

116

117 To advance DM concepts and their use in pain medicine research, it is imperative to assess the global  
118 regulatory sphere. Over the last decade, a plethora of legislations and regulatory guidelines around  
119 DM have been developed by the World Health Organisation (WHO),<sup>7</sup> Medicines and Healthcare  
120 products Regulatory Agency (MHRA),<sup>8</sup> Food and Drug Administration (FDA)<sup>9</sup> and National  
121 Institute for Health and Care Excellence (NICE)<sup>10</sup> (Supplementary Table 2). However, there are  
122 complexities around evaluating Artificial Intelligence (AI)-based applications that fall under the  
123 category of DM. This includes those using algorithms based on machine learning (ML) models that  
124 may be categorised as a medical device. Furthermore, development of AI applications requires  
125 documentary evidence that the planning, designing, and development phases meet the globally  
126 accepted International Organisation for Standardisation (ISO) standards. In order to achieve ISO  
127 standards, a high proficiency of conformances should be maintained by the research group  
128 responsible for developing the intervention that could be mass produced. As part of this  
129 standardisation process, the intervention may undergo several non-conformity assessments as well as  
130 vigorous testing and validation prior to being deployed.

131 [SUPPLEMENTARY TABLE 2]

132 The regulatory and standards required for novel innovations are also dependent on the disease  
133 classification. The current classification of chronic and acute pain conditions (Figure 1 and Figure 2  
134 respectively) employs the guidelines published by the International Association for the Study of Pain.  
135 Clinicians evaluating both chronic and acute chronic pain are considering changes to guidelines to  
136 provide better diagnoses and improve outcomes for patients. Advancements in the understanding of  
137 the pathophysiology of acute and chronic pain have resulted in effective pharmacological approaches  
138 to sub-populations of patients.

139 [FIGURE 1]

140 [FIGURE 2]

141 A critical step of DM is the development of digital tools using large sets of datasets and aggregated  
142 data to create novel paradigms of care. This is also referred to as evidence-based digital medicine  
143 which uses EBM concepts. To disperse these paradigms, computer programming, utility and broad  
144 access of applications are vital. The development of smartphone applications is key to deliver the  
145 DM phenomenon to facilitate communication and engagement between clinicians and patients. A key  
146 element would be to personalise both treatments and applications using sensors and programming  
147 capabilities that would support significant benefits as summarised in Supplementary Table 3.

148 [SUPPLEMENTARY TABLE 3]

149 Evaluating the current DM landscape is equally important as developing novel applications. The  
150 accessibility of smartphones has given rise to multiple pilots of app-based longitudinal assessment  
151 programmes for chronic pain, which have shown promising early results.<sup>11,12</sup> Furthermore, the use of  
152 validated lifestyle devices such as the FitBit® as monitoring adjuncts could be combined with  
153 questionnaires and activity programmes to allow regular functional reassessment among chronic pain  
154 patients.<sup>13</sup>

155 Therefore, the primary aims of this study were to: (1) identify and report the current prevalence of  
156 DM application in pain medicine ; (2) identify and report the current DM application use within pain  
157 medicine. To achieve this, we aimed to explore the prevalence of these types of assessments' use and  
158 deployment of these using DM applications.

## 159 **Materials and methods**

160 An evidence synthesis methodology was developed for the purpose of this study, with a systematic  
161 review protocol published on PROSPERO (CRD42021248232). The Preferred Reporting Items for  
162 Systematic Reviews and Meta-analyses (PRISMA) was used to report findings.

### 163 *Search strategy and study selection*

164 PubMed and ScienceDirect were used to identify relevant studies that were peer-reviewed and  
165 published in English between the 1st of January 1990 and 1st of January 2021. Search terms used  
166 included *Chronic Pain, Pain Clinical Trials, Pain medicine, Pain medicine clinical research* and  
167 *Digital Clinical Trials*. All studies using DM applications for chronic pain conditions were included.  
168 Only studies that were peer-reviewed and published in English were included. Suitable publications  
169 were selected using the PICO (Population/Participants, Intervention(s), Comparison, Outcome)  
170 strategy. An independent reviewer screened studies included within the study by reading the full text.  
171 Initial title and abstracts for identified articles were screened by 4 investigators. Inclusion and  
172 exclusion criteria were assessed against each study. This was followed with the screening of the full  
173 study article independently by 2 investigators and included into the final data pool.

### 174 *Data extraction and synthesis*

175 The data extraction process involved reading titles and abstracts followed by the application of the  
176 refinement protocol where the full text was reviewed and subsequently verified. Key study details  
177 such as study title, citation details, methods, findings, limitations, characteristics of the study and  
178 conclusions were extracted. Differing opinions were resolved by review and discussion between the  
179 lead authors. The authors remained unblinded regarding the publisher details. A full methodological  
180 description is demonstrated within the supplementary document (Figure 3).

181 [FIGURE 3]

### 182 *Data analysis*

183 As all studies reported the mean and SD at several time points, a mathematical model was formulated  
184 as demonstrated in Supplementary Figure 1.

185 [SUPPLEMENTARY FIGURE 1]

186 BPI, NRS, PCP-S and pain evaluation questionnaires were used to assess pain intensity and pain  
187 interference; HADS, CES-D, BDI, PHQ-9, DASS, GAD-7 and STAI were used to assess depression  
188 and anxiety; FSS and MOS sleep scale were used to assess fatigue and sleep. All studies reported the  
189 mean and SD of the questionnaires across several timepoints, at baseline and follow-up. The baseline  
190 questionnaire score was subtracted from the follow-up questionnaire score to standardize the data and  
191 remove the initial effect. Score changes between these two time points reflect the treatment effect.  
192  $(x_e^0 - x_e^1)$  represented the change in the questionnaire scores between baseline (<sup>0</sup>) and follow-up (<sup>1</sup>)  
193 in the treatment group, which also indicated an improvement of treatments, and  $(x_c^0 - x_c^1)$   
194 represented the change in the questionnaire scores between baseline (<sup>0</sup>) and follow-up (<sup>1</sup>) in the  
195 control group.

196 Therefore,  $(x_e^0 - x_e^1) - (x_c^0 - x_c^1)$  showed the mean difference (MD) of the change of score between  
197 the two groups, which is the outcome of focus. If  $(x_e^0 - x_e^1) - (x_c^0 - x_c^1)$  is positive, it indicates the  
198 treatment was beneficial for patients in improving symptoms of pain. However, if  $(x_e^0 - x_e^1) -$   
199  $(x_c^0 - x_c^1)$  is negative, it indicates the treatment had no effect on improving pain.



200  $MD = (x_e^0 - x_e^1) - (x_c^0 - x_c^1)$

201  $MD \sim \mathcal{N} \left( (m_e^0 - m_e^1) - (m_c^0 - m_c^1), \frac{s_e^0^2}{n_e^0} + \frac{s_e^1^2}{n_e^1} + \frac{s_c^0^2}{n_c^0} + \frac{s_c^1^2}{n_c^1} \right)$

202 The scales of the questionnaires were different, therefore standardized mean differences (SMD) were  
 203 used to illustrate the change in the mean score of the treatment group versus the control group from  
 204 baseline to follow-up. The traditional form of SMD was

$$\widehat{g}_k = \left(1 - \frac{3}{4n_k - 9}\right) \frac{\widehat{u}_{ek} - \widehat{u}_{ck}}{\sqrt{((n_{ek} - 1)s_{ek}^2 + (n_{ck} - 1)s_{ck}^2)/(n_k - 2)}}$$

205  $\widehat{Var}(\widehat{g}_k) = \frac{n_k}{n_{ek} \cdot n_{ck}} + \frac{\widehat{g}_k^2}{2(n_k - 3.94)}$

206 where  $n_k = n_{ek} + n_{ck}$ ,  $n_{ek}$ ,  $\widehat{u}_{ek}$ ,  $s_{ek}$  are the number, mean and standard variation of treatment  
 207 group.  $n_{ck}$ ,  $\widehat{u}_{ck}$ ,  $s_{ck}$  are the number, mean and standard variation of the control group. The 95%  
 208 confidence interval (CI) was obtained by

209  $\widehat{g}_k \pm 1.96 * S.E.(\widehat{g}_k)$

210 where  $S.E.(\widehat{g}_k) = \sqrt{\widehat{Var}(\widehat{g}_k)}$ .

211  $\widehat{g}_k$  was transformed according to the traditional form, and  $\widehat{g}_k$  and  $S.E.(\widehat{g}_k)$  were calculated for each  
 212 study, with a random effect model used to pool the estimators. Funnel plot graphs demonstrated the  
 213 publication bias. Subgroup analysis and  $I^2$  were used to explain heterogeneity and Egger's test was  
 214 used to detect publication bias. All procedures were finished with STATA 16.1.

215 *Risk of bias*

216 The risk of bias (RoB) table (below) has been used to demonstrate the risk of bias within the  
 217 randomised controlled trials used in the systematic review and meta-analysis. The RoB is reflective  
 218 of a fixed set of biases within domains of study design, conduct and reporting. This combined with  
 219 the quality check allows the findings of the study to be scientifically justified, and clinically viable.

220 [TABLE 3]

221 AMSTAR was used also to assess methodological quality, where the total scores range from 0-11  
 222 (see Figure 4, below). An article would be considered as good quality with a score of 8-11, moderate  
 223 4-7 and low 0-3.

224 [FIGURE 4]

225 *Outcomes*

226 Outcomes of this study were reported via the meta-analysis which was based on the availability of  
 227 statistics reported by the systematically included studies. The following are the outcomes of this  
 228 study:

- 229 - Prevalence of DM applications, including categories
- 230 - Prevalence of chronic pain conditions using DM applications for self-reporting purposes
- 231 - Prevalence of pain outcomes of depression, anxiety, pain inferences, and fatigue and sleep
- 232 problems
- 233 - Clinical significance of the prevalence data
- 234 - Research significance of the prevalence data
- 235 - Critical interpretation of the identified data
- 236 - Common themes identified within the prevalence data

237

## 238 **Results**

239 The search yielded 84 publications, with 38<sup>11,16-52</sup> included as part of the systematic review (Table 1).  
240 Of the 38 studies, 7 were cross-sectional and lacked a control group. Eight studies comprised of a  
241 control and treatment group, although they either lacked statistical information completely or  
242 inconsistencies were identified that were associated with the mean and SD at baseline and beta  
243 coefficients at follow-up timepoints. Therefore, 16<sup>25,28,29,31,33,35-40,43,46,50-52</sup> were excluded and 22<sup>11,16-  
244 24,26,27,30,32,34,41,42,44,45,47-49</sup> were included into the final meta-analysis (Table 2).

245 [TABLE 1]

246 [TABLE 2]

### 247 *Meta-analysis*

248 All 22 studies included in the meta-analysis reported more than one pain-related symptom. One  
249 primary outcome reported in 15 studies was pain intensity. 11 reported depressive symptoms and 9  
250 anxiety symptoms. Pain interference was reported by 4 studies. Fatigue and sleep problems were  
251 included as secondary outcomes in two and one study respectively. Meta-analyses were conducted  
252 for each outcome separately.

253 [FIGURE 5a]

### 254 *Pain intensity*

255 All 15 studies provided the mean and SD. Therefore, the meta-analysis was based on the mean and  
256 SD. Figure 6 demonstrates a pooled SMD of 0.25 with a 95%CI of 0.03-0.46. SMD is statistically  
257 higher than 0; therefore, pain scores within the treatment group reduced compared to the control  
258 group, suggesting DM applications can significantly reduce symptoms of pain. A high heterogeneity  
259 of  $I^2=82.86\%$  was identified for this group ( $p=0.02$ ). A subgroup analysis was conducted to analyse  
260 the possible source of heterogeneity.

261 [FIGURE 5b]

### 262 *Depression*

263 The 11 studies reporting depressive symptoms used various assessment tools, including the Centre  
264 for Epidemiological Studies-Depression (CES-D), Beck Depression Inventory (BDI), Patient Health  
265 Questionnaire-8 and -9 (PHQ-8, PHQ-9), Hospital Anxiety and Depression Scale (HADS) and the  
266 Depression Anxiety Stress Scales (DASS). Ruehlman and colleagues (2012) used CES-D and DASS

267 to assess the depression of the participants twice. To avoid duplication we used only one (CES-D) of  
268 the means and SD of these two assessments so that 11 studies were included in meta-analysis. Figure  
269 7 showed that the pooled SMD was 0.30 with a 95%CI of 0.17-0.43, suggesting the use of DM  
270 applications reduced depression symptoms compared with the usual standard care, with an elevated  
271 heterogeneity of  $I^2 = 34.72\%$  ( $p=0.00$ ).

272 [FIGURE 5c]

### 273 *Anxiety*

274 Within the 9 studies reporting anxiety as a clinical outcome among chronic pain participants, the  
275 pooled SMD was 0.37 with a 95%CI of 0.05-0.69 (Figure 8). The SMD is significantly greater than  
276 0, indicating anxiety symptoms among participants following use of DM applications improved more  
277 than the control group. Additionally, a treatment effect greater than 0 was seen in each individual  
278 study, thus each study concluded that DM applications improve anxiety symptoms compared with  
279 controls. Heterogeneity seen within this dataset was high with  $I^2 = 88.34\%$  ( $p=0.02$ ), indicating a  
280 significant effect of the DM applications compared with the control group.

281 [FIGURE 6a]

### 282 *Pain interference*

283 Four studies reported pain interference, an important outcome in pain research. Figure 6a  
284 demonstrates a pooled SMD of 0.15 with a 95%CI of -0.05–0.34. SMD was not significantly higher  
285 than 0, suggesting that the improvement within the treatment group was not significantly greater than  
286 control group. DM applications appear to have no effect on participants exposed to the application  
287 based on an  $I^2 = 12.5\%$ , indicating mild heterogeneity. Therefore, a lack of a statistically obvious effect has  
288 been observed within the pooled dataset.

### 289 *Fatigue/sleep*

290 Two studies reported on fatigue and one study on sleep issues. The forest plots for these factors are  
291 illustrated below (Figures 6b and 6c).

292 [FIGURE 6b]

293 [FIGURE 6c]

294 The pooled SMD for fatigue was 0.29, indicating the treatment group improved following the  
295 completion of the DM application use. However, this conclusion is not statistically significant given  
296 the 95%CI of -0.18-0.76. This could be due to the presence of only 2 studies, and more is needed to  
297 reach a conclusion.

298 The pooled SMD for sleep issues was -0.04 with a 95%CI of -0.4-0.32. This indicates that DM  
299 applications did not improve sleep-related issues and is of a lower score compared to the control  
300 group. However, to provide a more comprehensive conclusion to this phenomenon, further studies  
301 would be required.

302



303 *Subgroup analysis*

304 Subgroup analysis was conducted to identify the source of raised heterogeneity when considering  
305 studies reporting on pain intensity. Initial analysis considered the categories of DM applications  
306 which included web-applications, mobile apps and chatbots. The analysis is demonstrated in Figure  
307 7.

308 [FIGURE 7]

309 The pooled SMD for web-applications was 0.22, indicating web-applications could reduce the  
310 intensity of pain compared to the control group. The pooled SMD of mobile apps was 0.30. This  
311 demonstrates a larger effect size in relieving the intensity of pain compared to control groups and to  
312 those using web-applications. The pooled SMD for chatbots was -0.02, indicating chatbots have a  
313 limited effect in reducing the intensity of pain in patients compared to the controls. Heterogeneity  
314 remained high in all three subgroups, so a second subgroup analysis was conducted based on  
315 exposure of pain symptoms. The pain exposure sub-group analysis included identified specific pain  
316 conditions: fibromyalgia, back pain, chronic pain, osteoarthritis pain, menstrual pain, and cancer-  
317 related pain (Figure 8).

318 [FIGURE 8]

319 Heterogeneity could only be calculated in three of the subgroups. It remained high within these  
320 pooled subgroups, although at a lower level compared to previous analyses. Cancer-related pain  
321 reported the highest level of heterogeneity ( $I^2=92.23\%$ ). Chronic pain and osteoarthritis pain groups  
322 reported an  $I^2$  of 82.44% and 85.19% respectively. However, due to the limited number of studies,  
323 pain and digital application exposures, the effect size could not be comprehensively assessed. A third  
324 subgroup analysis was conducted based on geographical locations (Figure 9a and 9b).

325 [FIGURE 9a]

326 [FIGURE 9b]

327 A sub-group analysis by country found that DM applications appear to be effective within  
328 populations in America, China, Germany, and Netherlands, while for Ireland and Norway, a  
329 statistically significant effect was lacking. Only mild heterogeneity levels were indicated for America  
330 ( $I^2=61.54\%$ ) and Germany ( $I^2=45.91\%$ ). The heterogeneity may well be due to nationality and  
331 ethnicity.

332 *Sensitivity analysis*

333 Based on the meta-analysis and the sub-group analysis conducted to demonstrate pain intensity  
334 outcomes from the digital tools reported by Anderson et al,<sup>49</sup> Chiauuzi et al<sup>42</sup> and Sun et al,<sup>34</sup> the  
335 standard mean deviation (SMD) was high. The primary populations of Chiauuzi and colleagues  
336 (2010) and Anderson and colleagues (2004) were African American followed by Hispanic, whilst  
337 Sun et al (2017) reported on a population of Chinese patients. Similar ethnicity and race patterns  
338 were found among 12 of the 15 studies in the meta-analysis. Of these, 5 reported ethnicity, although  
339 over 50% of the sample size was Caucasian. The other 7 did not provide specific percentages of the  
340 Caucasian representation. A sensitivity analysis was conducted to assess ethnic variability within the  
341 pooled sample size, which resulted in a SMD of 0.14 with a 95%CI of -0.07-0.35 (Figure 10).

342 [FIGURE 10]

343 The sensitivity analysis reveals DM applications appear to benefit patients. However, to conclusively  
344 demonstrate a statistical significance more studies would be required. The  $p$ -value where the reported  
345 SMD was greater than 0 was 0.2, indicating there is a 90% probability that the DM application would  
346 have a positive impact on the patient's pain. It is equally vital to recognize that the predominantly  
347 African American and Hispanic population-based studies reported a SMD of 0.76 with a 95% of  
348 0.48-1.05, and a study consisting entirely of African American and Hispanic participants reported a  
349 SMD of 0.19 (95%CI -0.21-0.59). Sun et al (2017) reported a SMD of 1.34 with a 95% CI of 0.72-  
350 1.96. Therefore, DM applications appear to have a positive impact on patients.

351 The sensitivity analysis shown in Figure 16 demonstrates strong heterogeneity. The main source of  
352 heterogeneity could be the difference in the treatment interventions deployed by way of the DM  
353 application. As this is associated with the interventions themselves rather than the DM applications, it  
354 is beyond the scope of this study, and could be explored in the future. Pooled SMD of web-  
355 application, mobile apps and chatbots were 0.22, 0.1 and -0.02 respectively. Figure 11 demonstrates  
356 that the most effective DM application could be mobile apps since web-applications are not a self-  
357 reported method.

358 [FIGURE 11]

359 *Publication bias*

360 Publication bias was assessed and reported using funnel plots and Egger's test to examine the small-  
361 study effect. Publication bias appears to be smaller among studies associated with fatigue and sleep,  
362 and higher in studies demonstrating pain intensity, depression, anxiety, and pain interferences. There  
363 is a lack of significant publication bias based on the funnel plot (Figure 12a, below). The Egger's test  
364  $p$ -value is 0.932, indicating the lack of a small study effect. However, there are 5 studies that fell  
365 outside the 95%CI which could affect our detection of publication bias. The  $p$ -value is not high but it  
366 is limited by the data and experimental quality.

367 [FIGURE 12a]

368 [FIGURE 12b]

369 [FIGURE 12c]

370 [FIGURE 12d]

371 Figures 12b and 12c indicate a lack of publication bias statistically for depression and anxiety, with  
372 Egger's test  $p$ -values of 0.838 and 0.712 respectively. Pain interferences (Figure 12d), which was  
373 included in four studies, had an Egger's test  $p$ -value of 0.43, which demonstrates we cannot detect a  
374 publication bias. The low numbers of studies reporting outcomes for fatigue and sleep problems  
375 meant analysis of publication bias was not possible.

376

377

378

## 379 Discussion

380 The prevalence of DM applications within pain research appear to be moderate and is focused around  
381 developed countries such as America and Germany. China appears to be the only country within Asia  
382 to have conducted a study to assess the use of DM applications among patients with chronic pain.  
383 This demonstrates an urgent need to conduct evaluations of these DM applications in low-income  
384 and middle-income countries to optimise and evaluate the efficacy and acceptability among patients  
385 and clinicians. Patient-reported DM applications identified in the systematic review could be  
386 categorised primarily as mobile apps and chatbots, as EHR systems were used to assess pain-  
387 associated outcomes. As a result of these differences, the prevalence of DM applications was meta-  
388 analysed at a granular level to identify and report pain outcomes such as depression, anxiety, pain  
389 intensity and pain inference that were assessed by the tools. The lack of uniformity among the  
390 assessments used within the applications are another issue that requires further elaboration if these  
391 are to be used by clinicians as part of a patient's ongoing clinical management. The assessments used  
392 also appear to be non-specific to a particular group of patients. Often, the studies did not report on  
393 underlying conditions or if the pain conditions had a clinical diagnosis. Thus, it is challenging to  
394 demonstrate that users demonstrated true clinical benefit. This suggests there is little quantifiable data  
395 to provide a comprehensive conclusion in terms of the generalisability and feasibility of these  
396 applications globally.

397 We identified multiple themes and sub-themes in this analysis that were pooled as mobile  
398 applications, EHR and chatbots. Mobile applications have grown rapidly to support the management  
399 of pain disorders such as migraine, back pain and fibromyalgia by offering educational components,  
400 exercise platforms, relaxation techniques and mindfulness-based options to name a few. These  
401 options provide feedback and allow engagement and adherence of the users. This may explain why  
402 mobile applications demonstrated better results compared with other DM applications in the  
403 management of chronic pain. Another facet to consider is the inclusion of these datasets to maintain a  
404 structured approach to deliver effective continuity of care provision. Trials promoting the evaluation  
405 of data in a comprehensive manner through systems that allow the standardisation and acceptance of  
406 quality data would increase the acceptance of digitised data. Trials involving DM applications that  
407 incorporate AI-based clinical algorithms to assist with the evaluation of pain and outcomes in  
408 patients with cancer appear encouraging.<sup>53</sup>

409 Ledel Solem and colleagues (2019) reported adult participants were in favour of using DM-based  
410 self-management interventions for chronic pain management.<sup>54</sup> Patients felt that the accessibility,  
411 usability, and personalisation were vital for DM tools, and suggested that these should be further  
412 developed to distract them from pain, regardless of pain intensity and cognitive capacity.

413 The benefits of harnessing DM within the context of pain medicine could improve both clinical and  
414 patient-reported outcomes. Evidence-gathering to support therapeutic efficacy for pharmacological or  
415 surgical treatments requires effective and robust methodology, yet rigid traditional trial designs  
416 remain inefficient and struggle with implementation into clinical practice, limiting sustainability  
417 within healthcare systems. Computer-based technology could address these obstacles in research. The  
418 flexibility and accessibility of digital technology enables a more convenient and improved consenting  
419 process. This could allow easier enrolment and participation in studies for populations disadvantaged  
420 by mobility or literacy issues. Increased recruitment and retention lead to larger study populations  
421 with greater data validity, and aids researchers by speeding up recruitment and assessment of large  
422 trial populations.

423 Digital clinical trials are key in collating all the above factors, as it is a fundamental tool in assessing  
424 the efficacy and safety of novel drugs, medical devices, and health system interventions. Traditional  
425 clinical trials have demonstrated the validity, acceptability, and sustainability of the interventions,  
426 whilst digital clinical trials could leverage technologies to engage and report trial-specific  
427 measurements associated with the interventions being tested at a lower cost.<sup>59</sup> Conceptualising digital  
428 clinical trials for pain medicine could have added benefits, especially for patients who could report  
429 pain episodes daily. That would allow digital analytics to assess considerations clinicians need to  
430 make when developing clinical treatments. Additionally, data science approaches could be leveraged  
431 in this instance to develop novel clinical methods to best utilise trial data with ‘real-world’ data to  
432 develop aggregated datasets. These could be used to promote multi-morbid clinical research, which is  
433 vital in furthering clinical practices associated with pain medicine.

#### 434 *Limitations*

435 Unified approaches of conducting DM application assessments were lacking across all 3 categories  
436 identified and reported within the scope of this study. As a result, the pooled analysis conducted  
437 limits the generalizability of the findings. It is evident that the lack of validation in digital  
438 applications is another rate-limiting factor in furthering the use of these among clinical populations.

#### 439 *Conclusion*

440 The pain medicine ecosystem has a plethora of research studies, although those in population  
441 research, prevention, clinical trials, and education, as well as training, need to evolve if  
442 improvements are to be made clinically. This could integrate evolving DM concepts, including AI  
443 applications, that could improve patient-reported outcomes. It is, therefore, important to conduct  
444 further well-designed digital clinical trials.

445 Another concern based on evidence ascertained in this study is the minimal use of clinical trials to  
446 test DM applications; therefore, the efficacy and efficiency of these, as well as the generalizability to  
447 a wider population, remain limited. Pragmatic and novel methods of conducting clinical trials would  
448 be beneficial in providing credible evidence before these DM applications are used within clinical  
449 practice. Alternatives such as simulation studies using *real-world* environments could be used to test  
450 novel DM applications, given the complexities around conducting pain research. Similarly, it may be  
451 beneficial for patients to gain access to DM applications more quickly, especially those managing  
452 chronic pain. Therefore, a paradox of “*no evidence, no implementation vs. no implementation, no  
453 evidence*” is a challenge to clinicians, patients, policymakers, and clinical researchers alike. Using  
454 simulation methods, where possible, could provide an alternative method to overcome this paradox,  
455 although there may be limitations that would need considering as it not always feasible to design  
456 precise simulations or perform competency validation. The proliferation of digital technologies  
457 would provide the leverage to optimise global care by way of mobile platforms, to open better  
458 avenues, and to measure outcome data from wearable devices. These applications use real-world data  
459 that could benefit patients and clinicians alike. Thus, the use of DM in pain medicine could promote  
460 a myriad of benefits.

461

462

463

464

465

466

467 **References**

- 468 1. Edwards RR, Dworkin RH, Turk DC, Angst MS, Dionne R, Freeman R, et al. Patient  
469 phenotyping in clinical trials of chronic pain treatments: IMMPACT recommendations. *Pain*.  
470 2016;157(9):1851-1871. doi:10.1097/j.pain.0000000000000602
- 471 2. Rosenblum A, Marsch LA, Joseph H, Portenoy RK. Opioids and the treatment of chronic  
472 pain: controversies, current status, and future directions. *Exp Clin Psychopharmacol*.  
473 2008;16(5):405-416. doi:10.1037/a0013628
- 474 3. Broderick JE, Schwartz JE, Vikingstad G, Pribbernow M, Grossman S, Stone AA. The  
475 accuracy of pain and fatigue items across different reporting periods. *Pain*. 2008;139(1):146-  
476 157. doi:10.1016/j.pain.2008.03.024
- 477 4. Bolger N, Laurenceau J. *Intensive longitudinal methods: An introduction to diary and*  
478 *experience sampling research*. Guilford Press; 2013.
- 479 5. Fillingim RB, Loeser JD, Baron R, Edwards RR. Assessment of Chronic Pain: Domains,  
480 Methods, and Mechanisms. *J Pain*. 2016;17(9 Suppl):T10-T20.  
481 doi:10.1016/j.jpain.2015.08.010
- 482 6. Mun CJ, Suk HW, Davis MC, Karoly P, Finan P, Tennen H, et al. Investigating  
483 intraindividual pain variability: methods, applications, issues, and directions. *Pain*.  
484 2019;160(11):2415-2429. doi:10.1097/j.pain.0000000000001626
- 485 7. World Health Organization. Monitoring and Evaluating Digital Health Interventions: a  
486 practical guide to conducting research and assessment.  
487 [http://apps.who.int/iris/bitstream/handle/10665/252183/9789241511766-](http://apps.who.int/iris/bitstream/handle/10665/252183/9789241511766-eng.pdf;jsessionid=9630003E91620D111417E2CE52AF8075?sequence=1)  
488 [eng.pdf;jsessionid=9630003E91620D111417E2CE52AF8075?sequence=1](http://apps.who.int/iris/bitstream/handle/10665/252183/9789241511766-eng.pdf;jsessionid=9630003E91620D111417E2CE52AF8075?sequence=1). Accessed 23  
489 May, 2021.
- 490 8. Medicines & Healthcare products Regulatory Agency. Custom-made devices in Great Britain.  
491 [https://www.gov.uk/government/publications/custom-made-medical-devices/custom-made-](https://www.gov.uk/government/publications/custom-made-medical-devices/custom-made-devices-in-great-britain)  
492 [devices-in-great-britain](https://www.gov.uk/government/publications/custom-made-medical-devices/custom-made-devices-in-great-britain). Accessed 23 May, 2021.
- 493 9. U.S. Food and Drug Administration. Factors to Consider Regarding Benefit Risk in Medical  
494 Device Product Availability, Compliance, and Enforcement Decisions: Guidance for Industry  
495 and Food and Drug Administration Staff.  
496 [https://www.fda.gov/files/medical%20devices/published/Factors-to-Consider-Regarding-](https://www.fda.gov/files/medical%20devices/published/Factors-to-Consider-Regarding-Benefit-Risk-in-Medical-Device-Product-Availability--Compliance--and-Enforcement-Decisions---Guidance-for-Industry-and-Food-and-Drug-Administration-Staff.pdf)  
497 [Benefit-Risk-in-Medical-Device-Product-Availability--Compliance--and-Enforcement-](https://www.fda.gov/files/medical%20devices/published/Factors-to-Consider-Regarding-Benefit-Risk-in-Medical-Device-Product-Availability--Compliance--and-Enforcement-Decisions---Guidance-for-Industry-and-Food-and-Drug-Administration-Staff.pdf)  
498 [Decisions---Guidance-for-Industry-and-Food-and-Drug-Administration-Staff.pdf](https://www.fda.gov/files/medical%20devices/published/Factors-to-Consider-Regarding-Benefit-Risk-in-Medical-Device-Product-Availability--Compliance--and-Enforcement-Decisions---Guidance-for-Industry-and-Food-and-Drug-Administration-Staff.pdf). Accessed  
499 23 May, 2021.
- 500 10. National Institute for Health and Care Excellence. Evidence standards framework for digital  
501 health technologies. [https://www.nice.org.uk/Media/Default/About/what-we-do/our-](https://www.nice.org.uk/Media/Default/About/what-we-do/our-programmes/evidence-standards-framework/digital-evidence-standards-framework.pdf)  
502 [programmes/evidence-standards-framework/digital-evidence-standards-framework.pdf](https://www.nice.org.uk/Media/Default/About/what-we-do/our-programmes/evidence-standards-framework/digital-evidence-standards-framework.pdf).  
503 Accessed 23 May, 2021.
- 504 11. Gentili C, Zetterqvist V, Rickardsson J, Holmström L, Simons LE, Wicksell RK. ACTsmart:  
505 Guided Smartphone-Delivered Acceptance and Commitment Therapy for Chronic Pain-A  
506 Pilot Trial. *Pain Med*. 2021;22(2):315-328. doi:10.1093/pm/pnaa360



- 507 12. Bostrøm K, Børøsund E, Varsi C, Eide H, Nordang EF, Schreurs KM, et al. Digital Self-  
508 Management in Support of Patients Living With Chronic Pain: Feasibility Pilot Study. *JMIR*  
509 *Form Res.* 2020;4(10):e23893. doi:10.2196/23893
- 510 13. Greenberg J, Popok PJ, Lin A, Kulich RJ, James P, Macklin EA, et al. A Mind-Body Physical  
511 Activity Program for Chronic Pain With or Without a Digital Monitoring Device: Proof-of-  
512 Concept Feasibility Randomized Controlled Trial. *JMIR Form Res.* 2020;4(6):e18703.  
513 doi:10.2196/18703
- 514 14. Jonassaint CR, Rao N, Sciuto A, Switzer GE, De Castro L, Kato GJ, et al. Abstract  
515 Animations for the Communication and Assessment of Pain in Adults: Cross-Sectional  
516 Feasibility Study. *J Med Internet Res.* 2018;20(8):e10056. doi:10.2196/10056
- 517 15. van der Heijden AA, Abramoff MD, Verbraak F, van Hecke MV, Liem A, Nijpels G.  
518 Validation of automated screening for referable diabetic retinopathy with the IDx-DR device  
519 in the Hoorn Diabetes Care System. *Acta Ophthalmol.* 2018;96(1):63-68.  
520 doi:10.1111/aos.13613
- 521 16. Bossen D, Veenhof C, Van Beek KE, Spreuwenberg PM, Dekker J, De Bakker DH.  
522 Effectiveness of a web-based physical activity intervention in patients with knee and/or hip  
523 osteoarthritis: randomized controlled trial. *J Med Internet Res.* 2013;15(11):e257.  
524 doi:10.2196/jmir.2662
- 525 17. Hedman-Lagerlöf M, Hedman-Lagerlöf E, Axelsson E, Ljótsson B, Engelbrektsson J,  
526 Hultkrantz S, et al. Internet-Delivered Exposure Therapy for Fibromyalgia: A Randomized  
527 Controlled Trial. *Clin J Pain.* 2018;34(6):532-542. doi:10.1097/AJP.0000000000000566
- 528 18. Krein SL, Kadri R, Hughes M, Kerr EA, Piette JD, Holleman R, et al. Pedometer-based  
529 internet-mediated intervention for adults with chronic low back pain: randomized controlled  
530 trial. *J Med Internet Res.* 2013;15(8):e181. doi:10.2196/jmir.2605
- 531 19. Rini C, Porter LS, Somers TJ, McKee DC, DeVellis RF, Smith M, et al. Automated Internet-  
532 based pain coping skills training to manage osteoarthritis pain: a randomized controlled trial.  
533 *Pain.* 2015;156(5):837-848. doi:10.1097/j.pain.0000000000000121
- 534 20. Williams DA, Kuper D, Segar M, Mohan N, Sheth M, Clauw DJ. Internet-enhanced  
535 management of fibromyalgia: a randomized controlled trial. *Pain.* 2010;151(3):694-702.  
536 doi:10.1016/j.pain.2010.08.034
- 537 21. Wilson M, Roll JM, Corbett C, Barbosa-Leiker C. Empowering Patients with Persistent Pain  
538 Using an Internet-based Self-Management Program. *Pain Manag Nurs.* 2015;16(4):503-514.  
539 doi:10.1016/j.pmn.2014.09.009
- 540 22. Raj SX, Brunelli C, Klepstad P, Kaasa S. COMBAT study - Computer based assessment and  
541 treatment - A clinical trial evaluating impact of a computerized clinical decision support tool  
542 on pain in cancer patients. *Scand J Pain.* 2017;17:99-106. doi:10.1016/j.sjpain.2017.07.016
- 543 23. Guillory J, Chang P, Henderson Jr CR, Shengelia R, Lama S, Warmington M, et al. Piloting a  
544 Text Message-based Social Support Intervention for Patients With Chronic Pain: Establishing a  
545 Feasibility and Preliminary Efficacy. *Clin J Pain.* 2015;31(6):548-556.  
546 doi:10.1097/AJP.0000000000000193
- 547 24. Berman RL, Iris MA, Bode R, Drengenberg C. The effectiveness of an online mind-body  
548 intervention for older adults with chronic pain. *J Pain.* 2009;10(1):68-79.  
549 doi:10.1016/j.jpain.2008.07.006
- 550 25. Carpenter KM, Stoner SA, Mundt JM, Stoelb B. An online self-help CBT intervention for  
551 chronic lower back pain. *Clin J Pain.* 2012;28(1):14-22. doi:10.1097/AJP.0b013e31822363db



- 552 26. Menga G, Ing S, Khan O, Dupre B, Dornelles AC, Alarakhia A, et al. Fibromyalgia: can  
553 online cognitive behavioral therapy help? *Ochsner J*. 2014;14(3):343-349.  
554 <http://www.ochsnerjournal.org/content/14/3/343>. Accessed 15 February, 2022.
- 555 27. O'moore KA, Newby JM, Andrews G, Hunter DJ, Bennell K, Smith J, et al. Internet  
556 Cognitive-Behavioral Therapy for Depression in Older Adults with Knee Osteoarthritis: A  
557 Randomized Controlled Trial. *Arthritis Care Res (Hoboken)*. 2018;70(1):61-70.  
558 doi:10.1002/acr.23257
- 559 28. Minen MT, Adhikari S, Seng EK, Jinich S, Powers SW, Lipton RB. Smartphone-based  
560 migraine behavioral therapy: a single-arm study with assessment of mental health predictors.  
561 *NPJ Digit Med*. 2019;2:46. doi:10.1038/s41746-019-0116-y
- 562 29. Toelle TR, Utpadel-Fischler DA, Haas KK, Priebe JA. App-based multidisciplinary back pain  
563 treatment versus combined physiotherapy plus online education: a randomized controlled  
564 trial. *NPJ Digit Med*. 2019;2:34. doi:10.1038/s41746-019-0109-x
- 565 30. Blödt S, Pach D, Eisenhart-Rothe SV, Lotz F, Roll S, Icke K, et al. Effectiveness of app-  
566 based self-acupressure for women with menstrual pain compared to usual care: a randomized  
567 pragmatic trial. *Am J Obstet Gynecol*. 2018;218(2):227.e1-227.e9.  
568 doi:10.1016/j.ajog.2017.11.570
- 569 31. Irvine AB, Russell H, Manocchia M, Mino DE, Glassen TC, Morgan R. Mobile-Web app to  
570 self-manage low back pain: randomized controlled trial. *J Med Internet Res*.  
571 2015;17(1):e3130. doi:10.2196/jmir.3130
- 572 32. Schatz J, Schlenz AM, McClellan CB, Puffer ES, Hardy S, Pfeiffer M, et al. Changes in  
573 coping, pain, and activity after cognitive-behavioral training: a randomized clinical trial for  
574 pediatric sickle cell disease using smartphones. *Clin J Pain*. 2015;31(6):536-547.  
575 doi:10.1097/AJP.0000000000000183
- 576 33. Skrepnik N, Spitzer A, Altman R, Hoekstra J, Stewart J, Toselli R. Assessing the Impact of a  
577 Novel Smartphone Application Compared With Standard Follow-Up on Mobility of Patients  
578 With Knee Osteoarthritis Following Treatment With Hylan G-F 20: A Randomized  
579 Controlled Trial. *JMIR Mhealth Uhealth*. 2017;5(5):e64. doi:10.2196/mhealth.7179
- 580 34. Sun Y, Jiang F, Gu JJ, Wang YK, Hua H, Li J, et al. Development and Testing of an  
581 Intelligent Pain Management System (IPMS) on Mobile Phones Through a Randomized Trial  
582 Among Chinese Cancer Patients: A New Approach in Cancer Pain Management. *JMIR*  
583 *Mhealth Uhealth*. 2017;5(7):e108. doi:10.2196/mhealth.7178
- 584 35. Guétin S, Brun L, Deniaud M, Clerc JM, Thayer JF, Koenig J. Smartphone-based Music  
585 Listening to Reduce Pain and Anxiety Before Coronarography: A Focus on Sex Differences.  
586 *Altern Ther Health Med*. 2016;22(4):60-63.
- 587 36. Jamison RN, Jurcik DC, Edwards RR, Huang CC, Ross EL. A Pilot Comparison of a  
588 Smartphone App With or Without 2-Way Messaging Among Chronic Pain Patients: Who  
589 Benefits From a Pain App? *Clin J Pain*. 2017;33(8):676-686.  
590 doi:10.1097/AJP.0000000000000455
- 591 37. Jibb LA, Stevens BJ, Nathan PC, Seto E, Cafazzo JA, Johnston DL, et al. Implementation and  
592 preliminary effectiveness of a real-time pain management smartphone app for adolescents  
593 with cancer: A multicenter pilot clinical study. *Pediatr Blood Cancer*. 2017;64(10):e26554.  
594 doi:10.1002/pbc.26554
- 595 38. Lee M, Lee SH, Kim T, Yoo HJ, Kim SH, Suh DW. Feasibility of a Smartphone-Based  
596 Exercise Program for Office Workers With Neck Pain: An Individualized Approach Using a

- 597 Self-Classification Algorithm. *Arch Phys Med Rehabil*. 2017;98(1):80-87.  
598 doi:10.1016/j.apmr.2016.09.002
- 599 39. Oldenmenger WH, Witkamp FE, Bromberg JE, Jongen JL, Lieverse PJ, Huygen FJ, et al. To  
600 be in pain (or not): a computer enables outpatients to inform their physician. *Ann Oncol*.  
601 2016;27(9):1776-1781. doi:10.1093/annonc/mdw250
- 602 40. Huber S, Priebe JA, Baumann KM, Plidschun A, Schiessl C, Tölle TR. Treatment of Low  
603 Back Pain with a Digital Multidisciplinary Pain Treatment App: Short-Term Results. *JMIR*  
604 *Rehabil Assist Technol*. 2017;4(2):e11. doi:10.2196/rehab.9032
- 605 41. Calner T, Nordin C, Eriksson MK, Nyberg L, Gard G, Michaelson P. Effects of a self-guided,  
606 web-based activity programme for patients with persistent musculoskeletal pain in primary  
607 healthcare: A randomized controlled trial. *Eur J Pain*. 2017;21(6):1110-1120.  
608 doi:10.1002/ejp.1012
- 609 42. Chiauzzi E, Pujol LA, Wood M, Bond K, Black R, Yiu E, et al. painACTION-back pain: a  
610 self-management website for people with chronic back pain. *Pain Med*. 2010;11(7):1044-  
611 1058. doi:j.1526-4637.2010.00879.x
- 612 43. Davis MC, Zautra AJ. An online mindfulness intervention targeting socioemotional  
613 regulation in fibromyalgia: results of a randomized controlled trial. *Ann Behav Med*.  
614 2013;46(3):273-284. doi:10.1007/s12160-013-9513-7
- 615 44. Dowd H, Hogan MJ, McGuire BE, Davis MC, Sarma KM, Fish RA, et al. Comparison of an  
616 Online Mindfulness-based Cognitive Therapy Intervention With Online Pain Management  
617 Psychoeducation: A Randomized Controlled Study. *Clin J Pain*. 2015;31(6):517-527.  
618 doi:10.1097/AJP.0000000000000201
- 619 45. Lin J, Wurst R, Paganini S, Hohberg V, Kinkel S, Göhner W, et al. A group- and smartphone-  
620 based psychological intervention to increase and maintain physical activity in patients with  
621 musculoskeletal conditions: study protocol for a randomized controlled trial ("MoVo-App").  
622 *Trials*. 2020;21(1):502. doi:10.1186/s13063-020-04438-4
- 623 46. Nordin CA, Michaelson P, Gard G, Eriksson MK. Effects of the Web Behavior Change  
624 Program for Activity and Multimodal Pain Rehabilitation: Randomized Controlled Trial. *J*  
625 *Med Internet Res*. 2016;18(10):e265. doi:10.2196/jmir.5634
- 626 47. Ruehlman LS, Karoly P, Enders C. A randomized controlled evaluation of an online chronic  
627 pain self management program. *Pain*. 2012;153(2):319-330. doi:10.1016/j.pain.2011.10.025
- 628 48. Ström L, Pettersson R, Andersson G. A controlled trial of self-help treatment of recurrent  
629 headache conducted via the Internet. *J Consult Clin Psychol*. 2000;68(4):722-727.  
630 doi:10.1037/0022-006x.68.4.722
- 631 49. Anderson KO, Mendoza TR, Payne R, Valero V, Palos GR, Nazario A, et al. Pain education  
632 for underserved minority cancer patients: a randomized controlled trial. *J Clin Oncol*.  
633 2004;22(24):4918-4925. doi:10.1200/JCO.2004.06.115
- 634 50. Lovell MR, Forder PM, Stockler MR, Butow P, Briganti EM, Chye R, et al. A randomized  
635 controlled trial of a standardized educational intervention for patients with cancer pain. *J Pain*  
636 *Symptom Manage*. 2010;40(1):49-59. doi:10.1016/j.jpainsymman.2009.12.013
- 637 51. Guétin S, Brun L, Mériadec C, Camus E, Deniaud M, Thayer JF, et al. A Smartphone-Based  
638 Music Intervention to Reduce Pain and Anxiety in Women before or during labor. *EuJIM*.  
639 2018;21:24-26. doi:10.1016/j.eujim.2018.06.001

- 640 52. Oldenmenger WH, Baan MAG, van der Rijt CCD. Development and feasibility of a web  
641 application to monitor patients' cancer-related pain. *Support Care Cancer*. 2018;26(2):635-  
642 642. doi:10.1007/s00520-017-3877-3
- 643 53. Kamdar M, Centi AJ, Agboola S, Fischer N, Rinaldi S, Strand JJ, et al. A randomized  
644 controlled trial of a novel artificial intelligence-based smartphone application to optimize the  
645 management of cancer-related pain. *J Clin Onc*. 2019;37:11514.  
646 doi:10.1200/JCO.2019.37.15\_suppl.11514
- 647 54. Solem IK, Varsi C, Eide H, Kristjansdottir OB, Mirkovic J, Børøsund E, et al. Patients' Needs  
648 and Requirements for eHealth Pain Management Interventions: Qualitative Study. *J Med*  
649 *Internet Res*. 2019;21(4):e13205. doi:10.2196/13205
- 650 55. Witzeman K, Flores OA, Renzelli-Cain RI, Worly B, Moulder JK, Carrillo JF, et al. Patient-  
651 Physician Interactions Regarding Dyspareunia with Endometriosis: Online Survey Results. *J*  
652 *Pain Res*. 2020;13:1579-1589. doi:10.2147/JPR.S248887
- 653 56. McConnell MV, Shcherbina A, Pavlovic A, Homburger JR, Goldfeder RL, Waggot D, et al.  
654 Feasibility of Obtaining Measures of Lifestyle From a Smartphone App: The MyHeart Counts  
655 Cardiovascular Health Study. *JAMA Cardiol*. 2017;2(1):67-76.  
656 doi:10.1001/jamacardio.2016.4395
- 657 57. Urteaga I, McKillop M, Elhadad N. Learning endometriosis phenotypes from patient-  
658 generated data. *NPJ Digit Med*. 2020;3:88. doi:10.1038/s41746-020-0292-9
- 659 58. Jacobson NC, Summers B, Wilhelm S. Digital Biomarkers of Social Anxiety Severity: Digital  
660 Phenotyping Using Passive Smartphone Sensors. *J Med Internet Res*. 2020;22(5):e16875.  
661 doi:10.2196/16875
- 662 59. Inan OT, Tenaerts P, Prindiville SA, Reynolds HR, Dizon DS, Cooper-Arnold K, et al.  
663 Digitizing clinical trials. *NPJ Digit Med*. 2020;3(101):1-7. doi:10.1038/s41746-020-0302-y
- 664 60. Guo C, Ashrafian H, Ghafur S, Fontana G, Gardner C, Prime M. Challenges for the  
665 evaluation of digital health solutions-A call for innovative evidence generation approaches.  
666 *NPJ Digit Med*. 2020;3:110. doi:10.1038/s41746-020-00314-2

667

## 668 Acknowledgments

669 This paper is part of the multifaceted ELEMI project that is sponsored by Southern Health NHS  
670 Foundation Trust and in collaboration with the University of Liverpool, University College London,  
671 University College London NHS Foundation Trust, Liverpool Women's Hospital, University of  
672 Southampton, Robinson Institute-University of Adelaide, Ramaiah Memorial Hospital (India),  
673 University of Geneva and Manchester University NHS Foundation Trust.

674 This paper is also part of the POP project focusing on Chronic Pain that is sponsored by University  
675 College London NHS Foundation Trust and in collaboration with University of Oxford and  
676 University of Southampton.

## 677 Funding

678 GD, and PP are supported by National Institute for Health Research (NIHR) Research Capability  
679 Funding (RCF) and by Southern Health NHS Foundation Trust. AS is supported by industry funding.

## 680 Author Contributions

681 GD conceptualised the logic model of this paper and developed the systematic methodology. GD and  
682 AS wrote the first draft of the manuscript. The systematic methodology was critically appraised by  
683 AS and GD initially. RE, GD and AS extracted the data. This data was reviewed by GD and AS. GD,  
684 JS and YZ developed the statistical analysis plan. JS, YZ, GD, TF and AS conducted the full  
685 analysis. The full paper was critically appraised by all authors. All authors approved the final version  
686 of the manuscript.

#### 687 **Conflict of Interest**

688 PP has received research grant from Novo Nordisk, and other, educational from Queen Mary  
689 University of London, other from John Wiley & Sons, other from Otsuka, outside the submitted  
690 work. SR reports other from Janssen, 691 Lundbeck and Otsuka outside the submitted work. All  
691 other authors report no conflict of interest.

692 TF has received funding from Boston Scientific. AS is the Chief Medical Officer for Nurokor  
693 Medical Systems.

694 The views expressed are those of the authors and not necessarily those of the NHS, the National  
695 Institute for Health Research, the Department of Health and Social Care or the Academic institutions.

#### 696 **Data Availability Statement**

697 All data used within this study has been publicly available. The authors will consider sharing the  
698 dataset gathered upon request.

699

#### 700 **Figure legends**

701 Figure 1: Chronic Pain Classification Tree (CPCT)

702 Figure 2: Acute Pain Classification Tree

703 Figure 3: Representation of the PRISMA Flowchart

704 Figure 4: AMSTAR assessment

705 Figure 5a: Forest plot of pain intensity

706 Figure 5b: Forest plot of depression

707 Figure 5c: Forest plot for anxiety

708 Figure 6a: Forest plot for pain interference

709 Figure 6b: Forest plot of fatigue

710 Figure 6c: Forrest plot of sleep

711 Figure 7: Subgroup analysis for pain intensity (web-application, mobile apps, chatbots)

712 Figure 8: Subgroup analysis for pain intensity (by pain type)

713 Figure 9a: Subgroup analysis for pain intensity (by country)

714 Figure 9b: Geographical spread of data collected for the systematic review

715 Figure 10: Sensitivity analysis without 3 BAME studies<sup>31,39,58</sup>

716 Figure 11: Sensitivity analysis without 3 BAME studies<sup>31,39,58</sup> (sub-grouped by digital applications)

717 Figure 12a: Funnel plot for pain intensity & Egger's test for pain intensity

718 Figure 12b: Funnel plot for depression & Egger's test for depression

719 Figure 12c: Funnel plot for anxiety & Egger's test for anxiety

720 Figure 12d: Funnel plot for pain inferences & Egger's test for pain inferences

721

722

723 **Tables**

724 **Table 1.** Characteristics of the systematically included studies

| <b>Author</b>                 | <b>Diagnosis/Treatment method</b> | <b>Digital application and method of application delivery</b> | <b>Study type</b> | <b>Sample size</b> | <b>Country</b> | <b>Exposure</b>        |
|-------------------------------|-----------------------------------|---------------------------------------------------------------|-------------------|--------------------|----------------|------------------------|
| Bossen et al (2013)           | Intervention                      | Web-based intervention                                        | RCT               | 199                | Netherlands    | osteoarthritis pain    |
| Hedman-Lagerlöf, et al (2018) | Intervention                      | Web-based intervention                                        | RCT               | 140                | Sweden         | fibromyalgia           |
| Krein et al (2013)            | Intervention                      | Web-based intervention                                        | RCT               | 229                | USA            | chronic low back pain  |
| Rini et al (2015)             | Intervention                      | Web-based intervention                                        | RCT               | 113                | USA            | osteoarthritis pain    |
| Williams et al (2010)         | Intervention                      | Web-based intervention                                        | RCT               | 118                | USA            | fibromyalgia           |
| Wilson et al (2015)           | Intervention                      | Web-based intervention                                        | RCT               | 92                 | USA            | chronic noncancer pain |
| Raj et al (2017)              | Intervention                      | Web-based intervention                                        | RCT               | 214                | Norway         | cancerrelated pain     |
| Guillory et al (2015)         | Chatbots                          | Text message and mobile app                                   | RCT Feasibility   | 68                 | USA            | chronic noncancer pain |

|                        |                                                      |                           |                              |     |         |                                   |
|------------------------|------------------------------------------------------|---------------------------|------------------------------|-----|---------|-----------------------------------|
|                        |                                                      |                           |                              |     |         |                                   |
| Berman et al (2009)    | Chatbots                                             | Web-based intervention    | RCT                          | 78  | USA     | chronic pain                      |
| Carpenter et al (2012) | Chatbots- Cognitive behavioral therapy with chapters | Web-based intervention    | RCT Pilot                    | 141 | USA     | chronic low back pain             |
| Menga et al (2014)     | Chatbots- Cognitive behavioral therapy with chapters | Web-based intervention    | RCT                          | 44  | USA     | Fibromyalgia                      |
| O'moore et al (2018)   | Chatbots- Cognitive behavioral therapy with chapters | Web-based intervention    | RCT                          | 69  | USA     | osteoarthritis pain               |
| Gentili et al (2020)   | Mobile app based acceptance therapy                  | Mobile based intervention | RCT pilot                    | 31  | Sweden  | chronic pain                      |
| Minen et al (2019)     | Mobile app based behavioral therapy                  | Mobile based intervention | Crosssectional - Feasibility | 51  | USA     | migraine                          |
| Toelle et al (2019)    | Mobile app based therapy                             | Mobile based intervention | RCT                          | 94  | Germany | Chronic nonspecific low back pain |
| Blödt et al (2018)     | Mobile app based self-acupressure                    | Mobile based intervention | RCT - Pragmatic              | 221 | Germany | menstrual pain                    |
| Irvine et al           | Mobile app based                                     | Mobile based              | RCT                          | 597 | USA     | chronic low                       |



|                          |                                                 |                           |                                            |     |             |                                                  |
|--------------------------|-------------------------------------------------|---------------------------|--------------------------------------------|-----|-------------|--------------------------------------------------|
| (2015)                   | self-management                                 | intervention              |                                            |     |             | back pain                                        |
| Schatz et al (2015)      | Mobile app based coping, pain and activity      | Mobile based intervention | RCT                                        | 46  | USA         | chronic pain for paediatric sickle cell          |
| Nebojsa et al (2017)     | Mobile app and an wearable activity monitor     | Mobile based intervention | RCT                                        | 211 | USA         | osteoarthritis pain                              |
| Sun et al (2017)         | Mobile app for pain management                  | Mobile based intervention | RCT                                        | 46  | China       | cancer-related pain                              |
| Guétin et al (2016)      | Mobile app delivering music therapy for pain    | Mobile based intervention | RCT                                        | 106 | France      | chronic pain                                     |
| Jamison et al (2017)     | Mobile app based daily assessment and treatment | Mobile based intervention | RCT - pilot                                | 90  | USA         | chronic pain                                     |
| Jibb et al (2017)        | Mobile apps                                     | Mobile based intervention | RCT - pragmatic                            | 40  | Canada      | cancer-related chronic pain among the adolescent |
| Lee et al (2017)         | Mobile app-based exercise program               | Mobile based intervention | Crosssection single group repeated measure | 23  | Korea       | neck pain                                        |
| Oldenmenger et al (2016) | Mobile apps                                     | Web-based intervention    | quantitative                               | 48  | Netherlands | cancer-related pain                              |

|                        |                                                         |                           |                   |     |         |                       |
|------------------------|---------------------------------------------------------|---------------------------|-------------------|-----|---------|-----------------------|
| Huber et al (2017)     | Mobile app and EHR                                      | Mobile based intervention | Retrospective RCT | 180 | Germany | chronic low back pain |
| Calner et al (2017)    | Intervention                                            | Web-based intervention    | RCT               | 109 | Sweden  | musculoskeletal pain  |
| Chiauzzi et al (2010)  | Intervention - self-management                          | Web-based intervention    | RCT               | 199 | USA     | chronic pain          |
| Davis et al (2013)     | Intervention of mindfulness                             | Web-based intervention    | RCT               | 79  | USA     | fibromyalgia          |
| Dowd et al (2015)      | Online mindfulness-based cognitive therapy intervention | Web-based intervention    | RCT               | 124 | Ireland | chronic pain          |
| Lin et al (2020)       | Mobile apps                                             | Web-based intervention    | RCT               | 302 | Germany | multimodal pain       |
| Nordin et al (2016)    | Intervention for web behaviour change                   | Web-based intervention    | RCT               | 109 | Sweden  | Multimodal pain       |
| Ruehlmana et al (2012) | Intervention self-management                            | Web-based intervention    | RCT               | 305 | USA     | chronic pain          |
| Ström et al (2000)     | Intervention – self-management                          | Web-based intervention    | RCT               | 45  | Sweden  | recurrent headache    |
| Anderson et al (2004)  | Intervention - video and booklet                        | Web-based intervention    | RCT               | 97  | USA     | Cancer-related pain   |

|                          |                                      |                           |              |     |             |                            |
|--------------------------|--------------------------------------|---------------------------|--------------|-----|-------------|----------------------------|
| Lovell et al (2010)      | Intervention – video and booklet     | Web-based intervention    | RCT          | 217 | Australia   | Cancer-related pain        |
| Guétin et al (2018)      | Smartphone-based intervention        | Mobile-based intervention | RCT          | 62  | France      | chronic painful conditions |
| Oldenmenger et al (2018) | Intervention – internet applications | Web-based intervention    | cohort study | 84  | Netherlands | Cancer-related pain        |

725 \*EHR = Electronic Health Records; RCT = Randomised clinical trial

726

727 **Table 2.** Studies included within the meta-analysis

| Study ID | Author                       | Digital applications | Study type | Sample size | Country     | Exposure            | P-value                                                   |
|----------|------------------------------|----------------------|------------|-------------|-------------|---------------------|-----------------------------------------------------------|
| 1        | Bossen et al (2013)          | web-application      | RCT        | 199         | Netherlands | osteoarthritis pain | 0.33 (pain intensity); 0.09 (depression); 0.007 (anxiety) |
| 2        | Hedman-Lagerlöf et al (2018) | web-application      | RCT        | 140         | Sweden      | fibromyalgia        | <0.001 (depression); <0.001 (anxiety); <0.001 (fatigue)   |
| 3        | Rini et al (2015)            | web-application      | RCT        | 113         | USA         | osteoarthritis pain | Not provided                                              |
| 4        | Williams et al (2010)        | web-application      | RCT        | 118         | USA         | fibromyalgia        | Not provided                                              |
| 5        | Wilson et                    | web-                 | RCT        | 92          | USA         | chronic             | 0.22 (pain intensity); 0.25                               |

|    |                       |                 |     |     |           |                       |                                                            |
|----|-----------------------|-----------------|-----|-----|-----------|-----------------------|------------------------------------------------------------|
|    | al (2015)             | application     |     |     |           | noncancer pain        | (depression)                                               |
| 6  | Raj et al (2017)      | web-application | RCT | 214 | Norway    | cancer-related pain   | Not provided                                               |
| 7  | Berman et al (2019)   | chatbots        | RCT | 78  | USA       | chronic pain          | Not provided                                               |
| 8  | Menga et al (2014)    | chatbots        | RCT | 44  | USA       | Fibromyalgia          | 0.005 (severity of fibromyalgia)                           |
| 9  | O'moore et al (2018)  | chatbots        | RCT | 69  | Australia | osteoarthritis pain   | Not provided                                               |
| 10 | Gentili et al (2020)  | Mobile apps     | RCT | 94  | Germany   | chronic low back pain | 0.021(pain intensity)                                      |
| 11 | Blödt et al (2018)    | Mobile apps     | RCT | 221 | Germany   | menstrual pain        | 0.026 (pain intensity)                                     |
| 12 | Schatz et al (2015)   | Mobile apps     | RCT | 46  | USA       | chronic pain          | 0.1 (negative affect)                                      |
| 13 | Sun et al (2017)      | Mobile apps     | RCT | 46  | China     | cancer-related pain   | <0.01 (pain intensity)                                     |
| 14 | Calner et al (2017)   | Mobile apps     | RCT | 109 | USA       | musculoskeletal pain  | 0.37 (intensity)                                           |
| 15 | Chiauzzi et al (2010) | Mobile apps     | RCT | 199 | USA       | chronic pain          | Not provided                                               |
| 16 | Dowd et al (2015)     | Mobile apps     | RCT | 124 | Ireland   | chronic pain          | Not provided                                               |
| 17 | Lin et al (2020)      | Mobile apps     | RCT | 302 | Germany   | multimodal pain       | 0.01 (pain intensity); <0.01 (depression); 0.44 (anxiety); |

|    |                        |                 |     |     |             |                     |                                                                                  |
|----|------------------------|-----------------|-----|-----|-------------|---------------------|----------------------------------------------------------------------------------|
|    |                        |                 |     |     |             |                     | <0.01 (pain interference)                                                        |
| 18 | Ruehlmana et al (2012) | Mobile apps     | RCT | 305 | USA         | chronic pain        | 0.2 (pain intensity); 0.06 (depression); 0.15 (anxiety); 0.3 (pain interference) |
| 19 | Ström et al (2000)     | Mobile apps     | RCT | 45  | Sweden      | recurrent headache  | Not provided                                                                     |
| 20 | Anderson et al (2004)  | web-application | RCT | 84  | Netherlands | Cancer-related pain | Not provided                                                                     |

728

729

730 **Table 3.** Risk of bias, according to the revised risk-of-bias tool for randomised trials (RoB 2.0)

| Author                        | Randomisation process | Deviations from the intended interventions | Missing Outcome Data | Measurement of the Outcome | Selection of the reported result | Overall       |
|-------------------------------|-----------------------|--------------------------------------------|----------------------|----------------------------|----------------------------------|---------------|
| Bossen et al (2013)           | some concerns*        | low risk                                   | low risk             | low risk                   | low risk                         | some concerns |
| Hedman-Lagerlöf, et al (2018) | low risk              | low risk                                   | low risk             | low risk                   | low risk                         | low risk      |
| Krein et al (2013)            | low risk              | low risk                                   | low risk             | low risk                   | low risk                         | low risk      |
| Rini et al (2015)             | low risk              | low risk                                   | low risk             | low risk                   | low risk                         | low risk      |
| Williams et al (2010)         | low risk              | low risk                                   | low risk             | low risk                   | low risk                         | low risk      |
| Wilson et al                  | low risk              | low risk                                   | low risk             | low risk                   | low risk                         | low risk      |

|                        |                  |          |          |          |          |               |
|------------------------|------------------|----------|----------|----------|----------|---------------|
| (2015)                 |                  |          |          |          |          |               |
| Raj et al (2017)       | low risk         | low risk | low risk | low risk | low risk | low risk      |
| Guillory et al (2015)  | low risk         | low risk | low risk | low risk | low risk | low risk      |
| Berman et al (2009)    | low risk         | low risk | low risk | low risk | low risk | low risk      |
| Carpenter et al (2012) | low risk         | low risk | low risk | low risk | low risk | low risk      |
| Menga et al (2014)     | low risk         | low risk | low risk | low risk | low risk | low risk      |
| O'moore et al (2018)   | low risk         | low risk | low risk | low risk | low risk | low risk      |
| Gentili et al (2020)   | low risk         | low risk | low risk | low risk | low risk | low risk      |
| Minen et al (2019)     | high risk**      | low risk | low risk | low risk | low risk | high risk     |
| Toelle et al (2019)    | some concerns*** | low risk | low risk | low risk | low risk | some concerns |
| Blödt et al (2018)     | low risk         | low risk | low risk | low risk | low risk | low risk      |
| Irvine et al (2015)    | low risk         | low risk | low risk | low risk | low risk | low risk      |
| Schatz et al (2015)    | low risk         | low risk | low risk | low risk | low risk | low risk      |
| Nebojsa et al (2017)   | low risk         | low risk | low risk | low risk | low risk | low risk      |
| Sun et al (2017)       | low risk         | low risk | low risk | low risk | low risk | low risk      |
| Guétin et al (2016)    | low risk         | low risk | low risk | low risk | low risk | low risk      |
| Jamison et al          | low risk         | low risk | low risk | low risk | low risk | low risk      |



|                          |             |          |          |          |          |                      |
|--------------------------|-------------|----------|----------|----------|----------|----------------------|
| (2017)                   |             |          |          |          |          |                      |
| Jibb et al (2017)        | low risk    | low risk | low risk | low risk | low risk | low risk             |
| Lee et al (2017)         | high risk** | low risk | low risk | low risk | low risk | high risk            |
| Oldenmenger et al (2016) | low risk    | low risk | low risk | low risk | low risk | low risk             |
| Huber et al (2017)       | low risk    | low risk | low risk | low risk | low risk | low risk             |
| Calner et al (2017)      | low risk    | low risk | low risk | low risk | low risk | low risk<br>low risk |
| Chiauzzi et al (2010)    | low risk    | low risk | low risk | low risk | low risk | low risk             |
| Davis et al (2013)       | low risk    | low risk | low risk | low risk | low risk | low risk             |
| Dowd et al (2015)        | low risk    | low risk | low risk | low risk | low risk | low risk             |
| Lin et al (2020)         | low risk    | low risk | low risk | low risk | low risk | low risk             |
| Nordin et al (2016)      | low risk    | low risk | low risk | low risk | low risk | low risk             |
| Ruehlmana et al (2012)   | low risk    | low risk | low risk | low risk | low risk | low risk             |
| Ström et al (2000)       | low risk    | low risk | low risk | low risk | low risk | low risk             |
| Anderson et al (2004)    | low risk    | low risk | low risk | low risk | low risk | low risk             |
| Lovell et al (2010)      | low risk    | low risk | low risk | low risk | low risk | low risk             |
| Guétin et al (2018)      | low risk    | low risk | low risk | low risk | low risk | low risk             |

|                          |             |          |          |          |          |           |
|--------------------------|-------------|----------|----------|----------|----------|-----------|
| Oldenmenger et al (2018) | high risk** | low risk | low risk | low risk | low risk | high risk |
|--------------------------|-------------|----------|----------|----------|----------|-----------|

- 731 \* Some concerns due to missing information regarding the allocation concealment.
- 732 \*\* High risk because of lack of randomisation.
- 733 \*\*\* Some concerns due to deviation from the protocol resulting in a 53:48 distribution of participants.

Figure 3. Representation of the PRISMA Flowchart

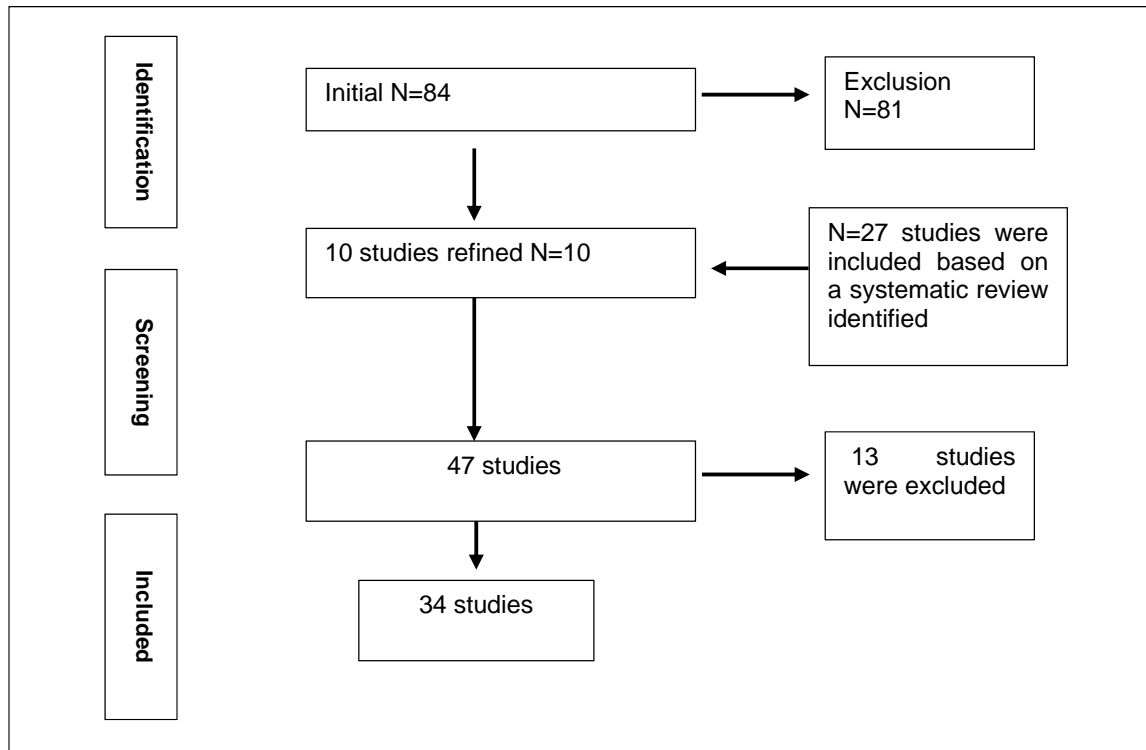

Figure 4. Mathematical model for data analysis

$$\begin{aligned}x_e^0 &\sim \mathcal{N}(m_e^0, s_e^{0^2}) \\x_e^1 &\sim \mathcal{N}(m_e^1, s_e^{1^2}) \\x_c^0 &\sim \mathcal{N}(m_c^0, s_c^{0^2}) \\x_c^1 &\sim \mathcal{N}(m_c^1, s_c^{1^2})\end{aligned}$$

Figure 6. Forest plot of pain intensity

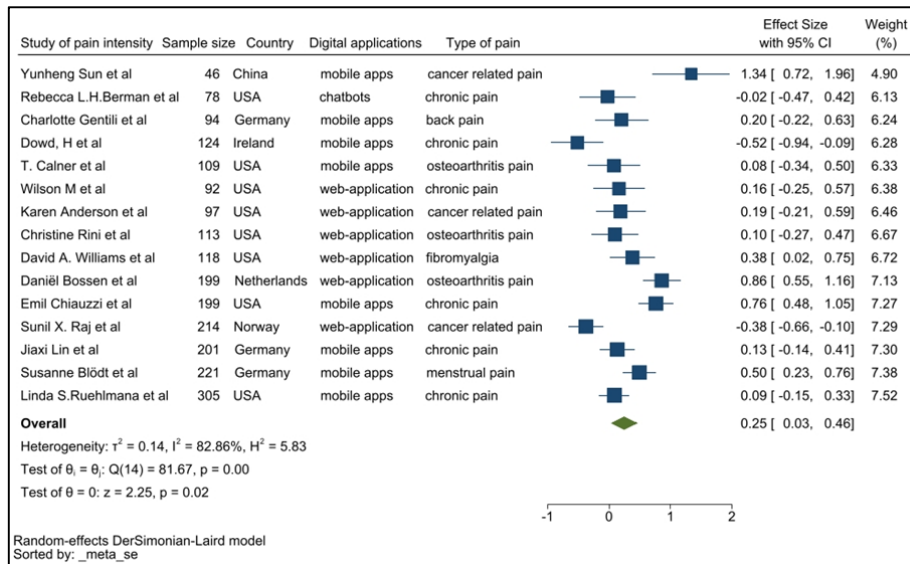

Figure 7. Forrest plot of depression

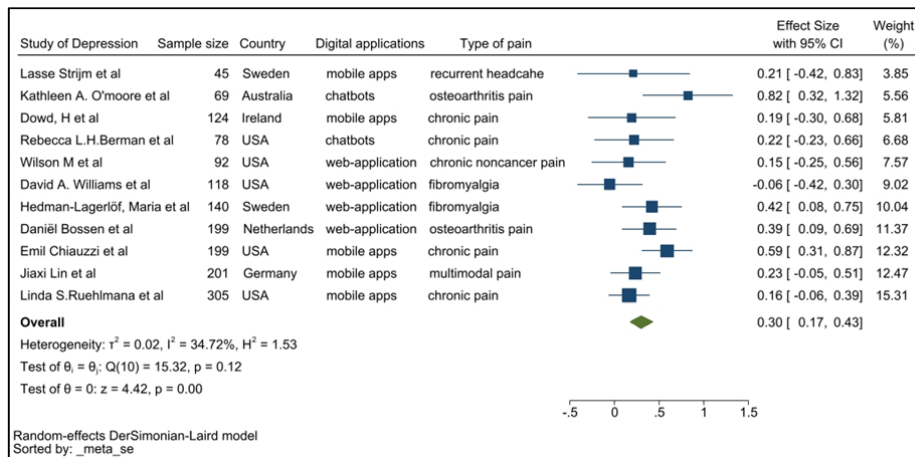

Figure 8. Forest plot for anxiety

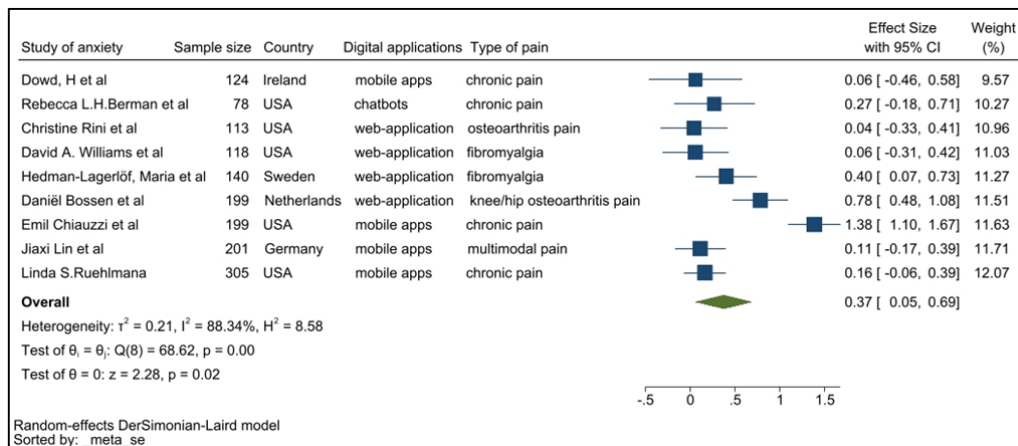

Figure 9. Forrest plot for pain interference

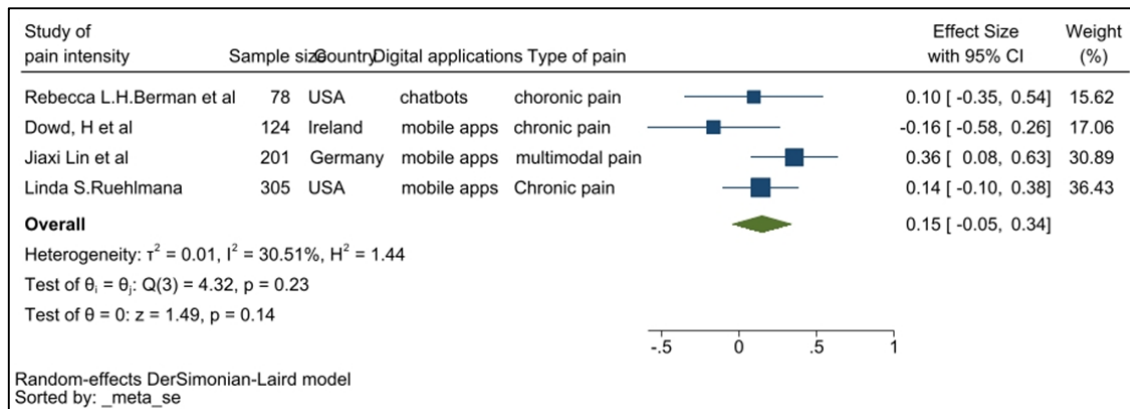

Figure 10. Forest plot of fatigue

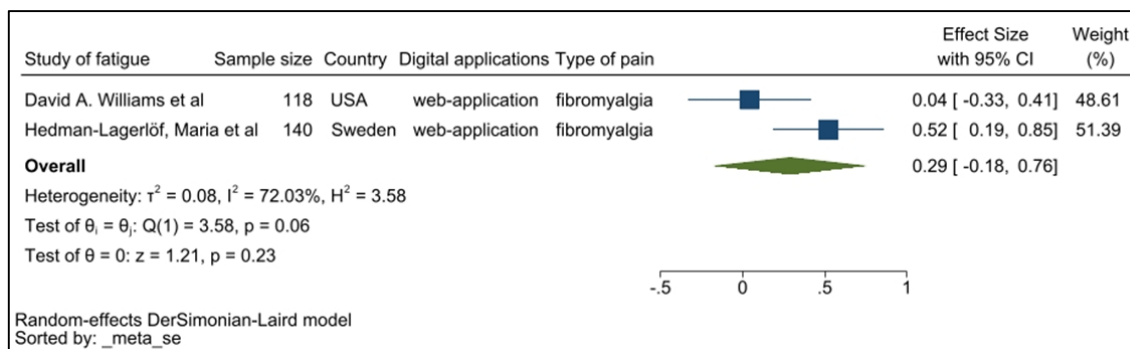

Figure 11. Forrest plot of sleep

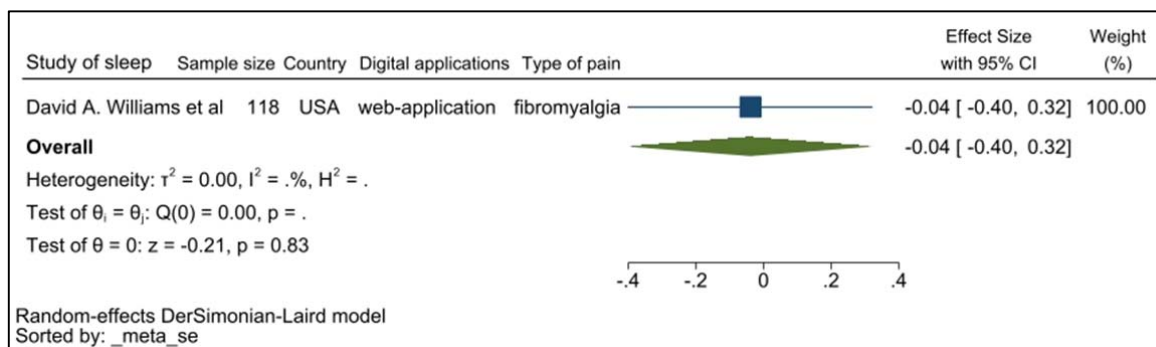

Figure 12 Subgroup analysis for pain intensity (web-application, mobile apps, chatbots)

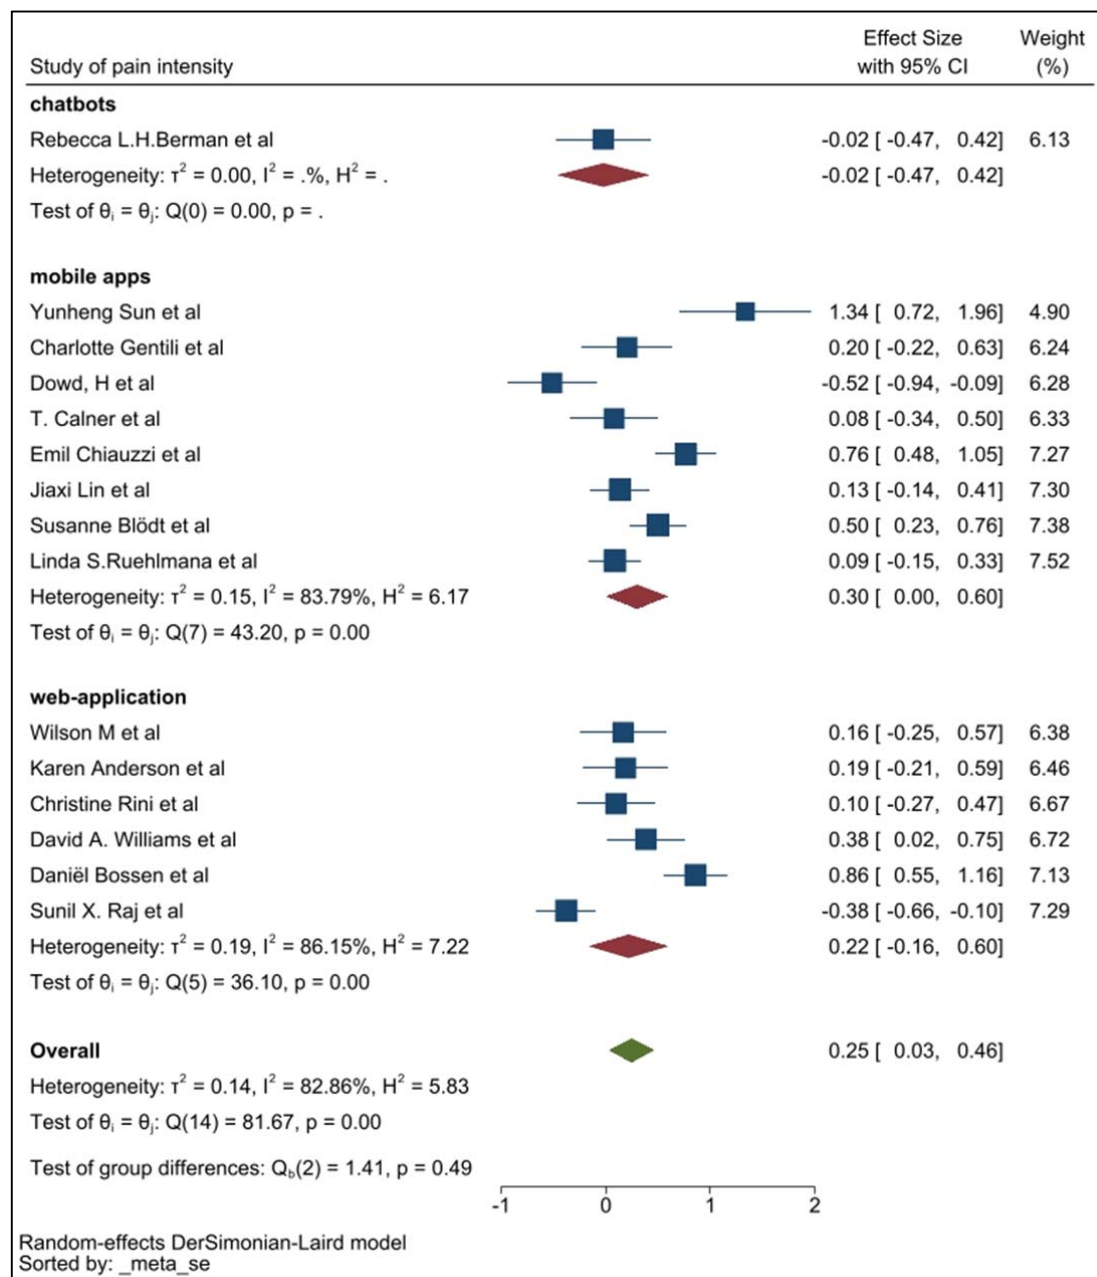

Figure 13. Subgroup analysis for pain intensity (by pain type)



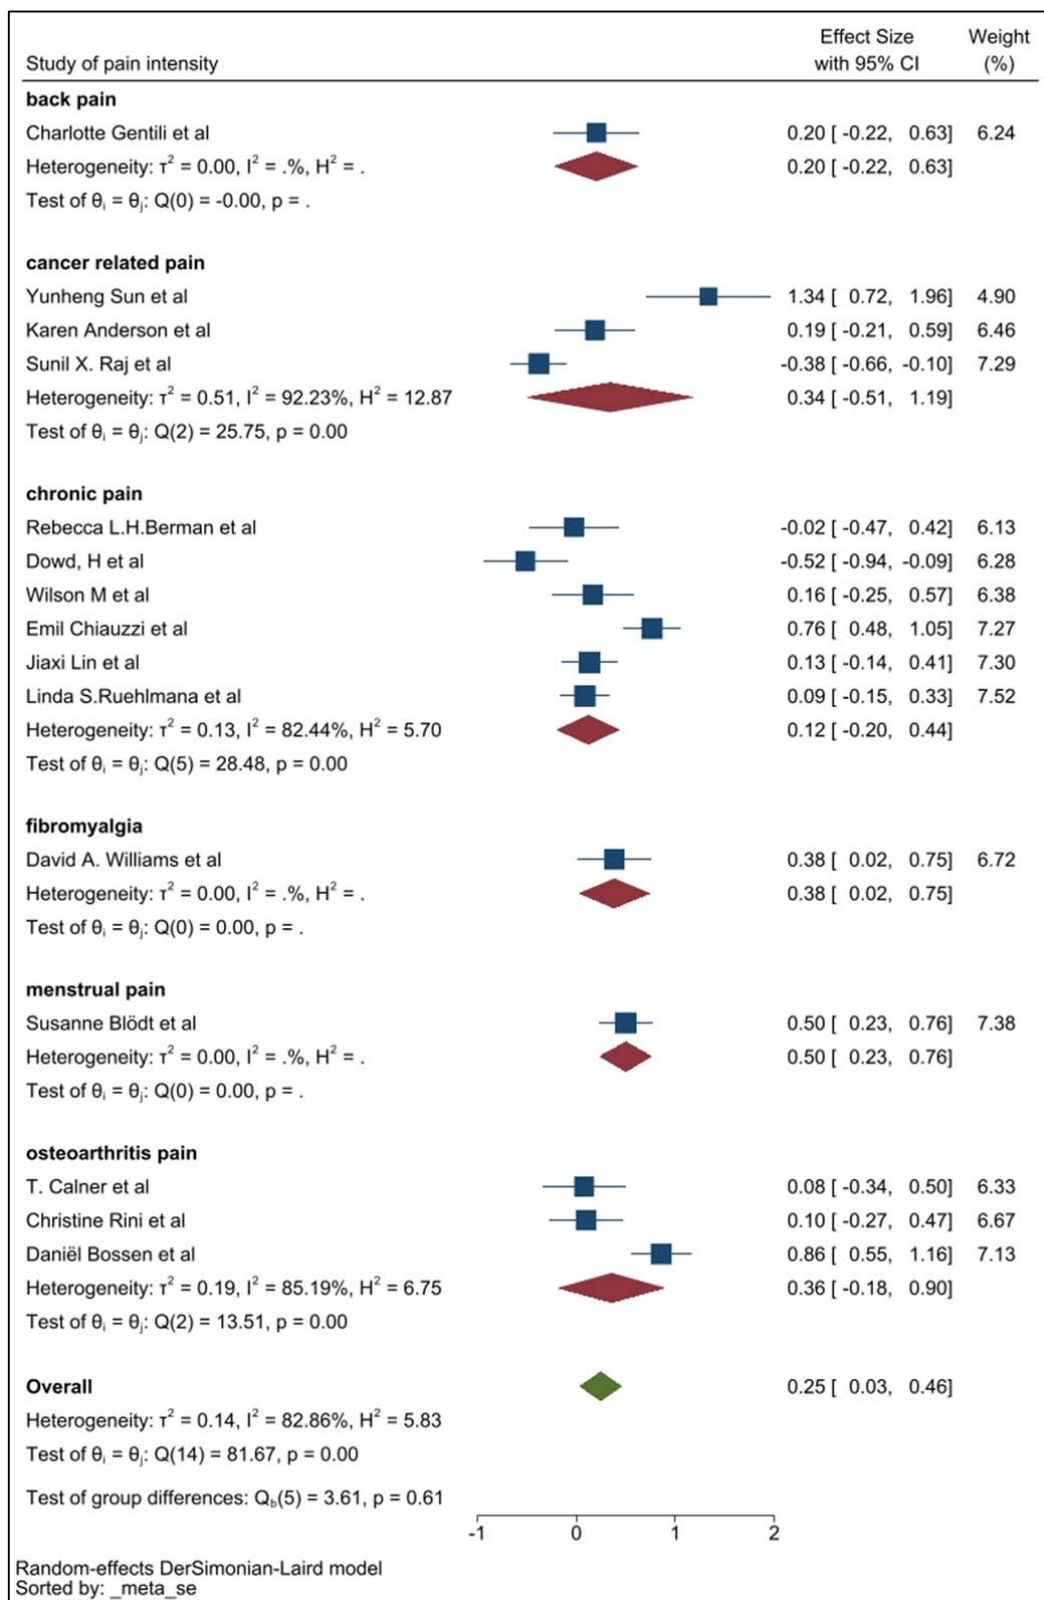

Figure 14a Subgroup analysis for pain intensity (by country)

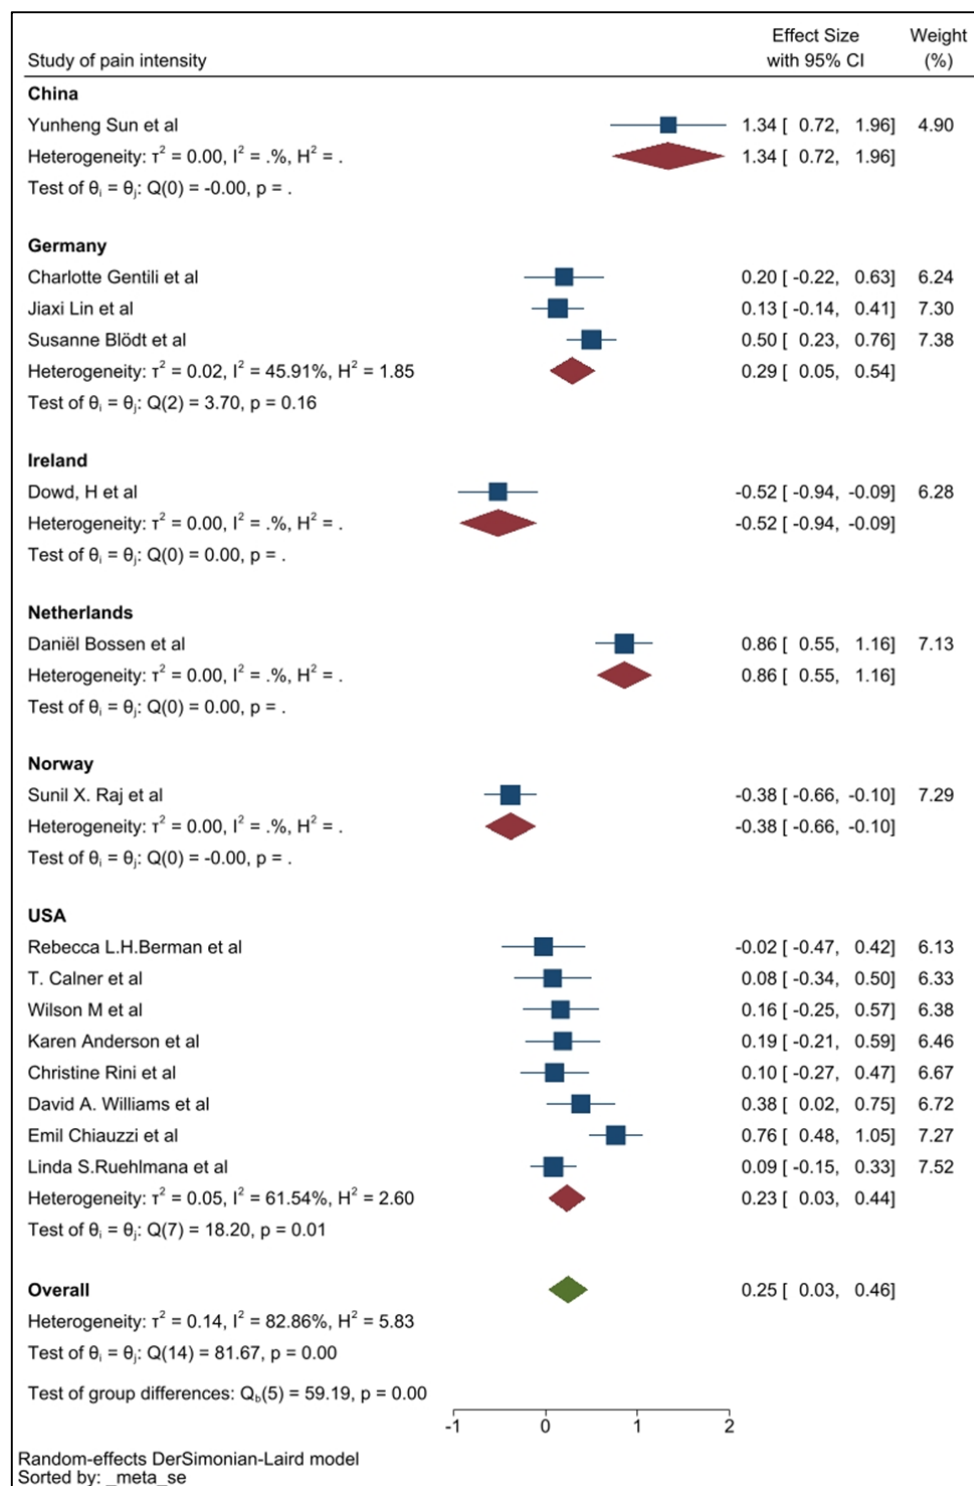

Figure 14b Geographical spread of data collected for the systematic review

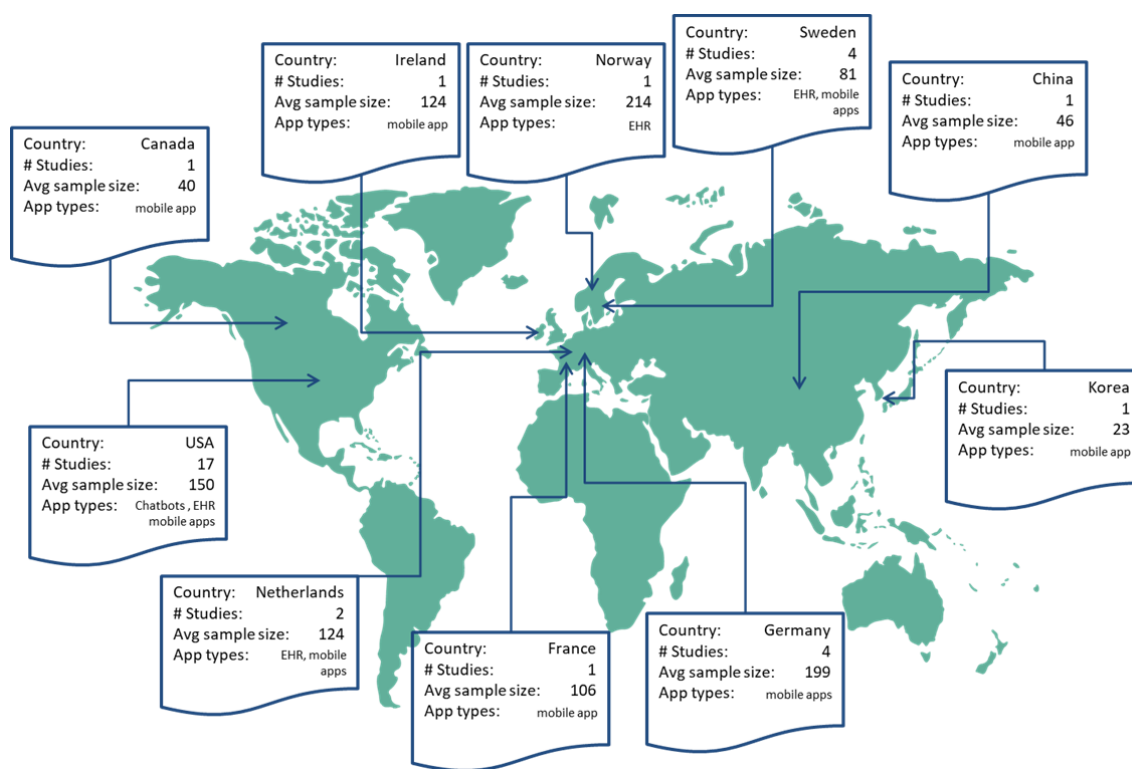

Figure 15. Sensitivity analysis without 3 BAME studies<sup>33,41,60</sup>

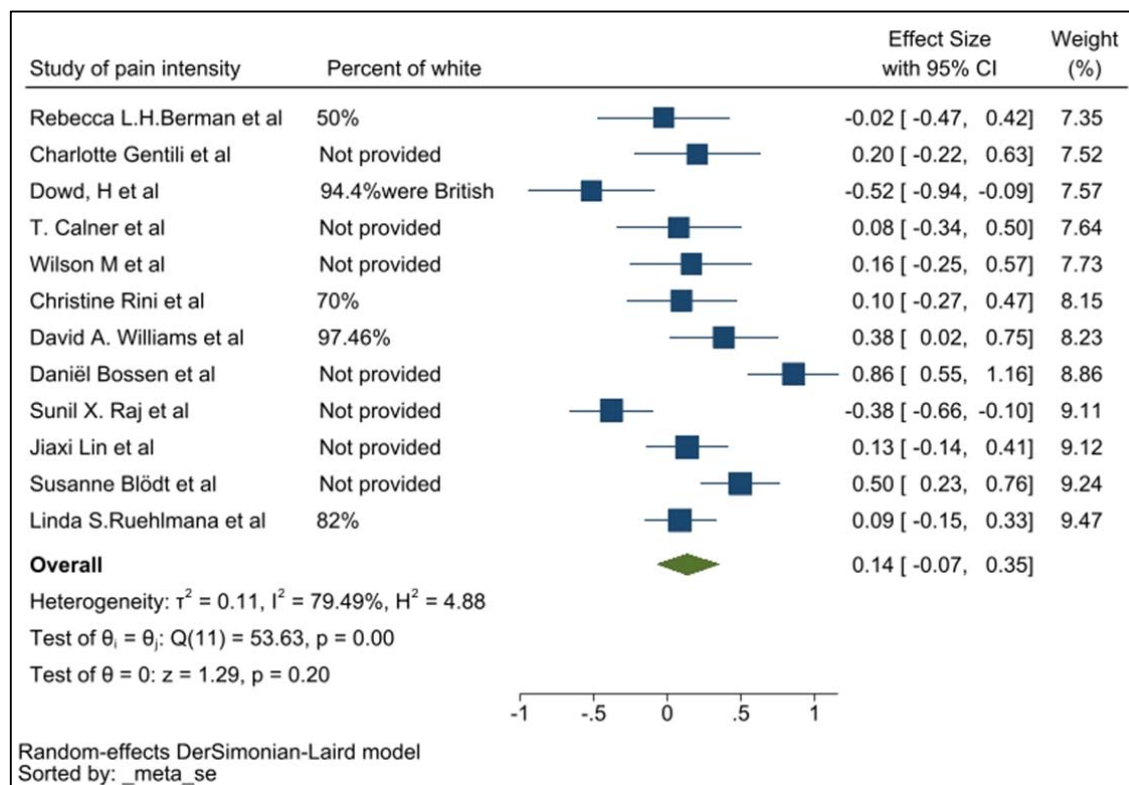

Figure 16. Sensitivity analysis without 3 BAME studies<sup>33,41,60</sup>

Number of studies = 4

Root MSE = 1.207

| Std_Eff | Coef.     | Std. Err. | t     | P> t  | [95% Conf. Interval] |          |
|---------|-----------|-----------|-------|-------|----------------------|----------|
| slope   | .5244641  | .3811539  | 1.38  | 0.303 | -1.115509            | 2.164437 |
| bias    | -2.348156 | 2.390633  | -0.98 | 0.430 | -12.63422            | 7.937908 |

Test of H0: no small-study effects

P = 0.430

(sub-grouped by digital applications)

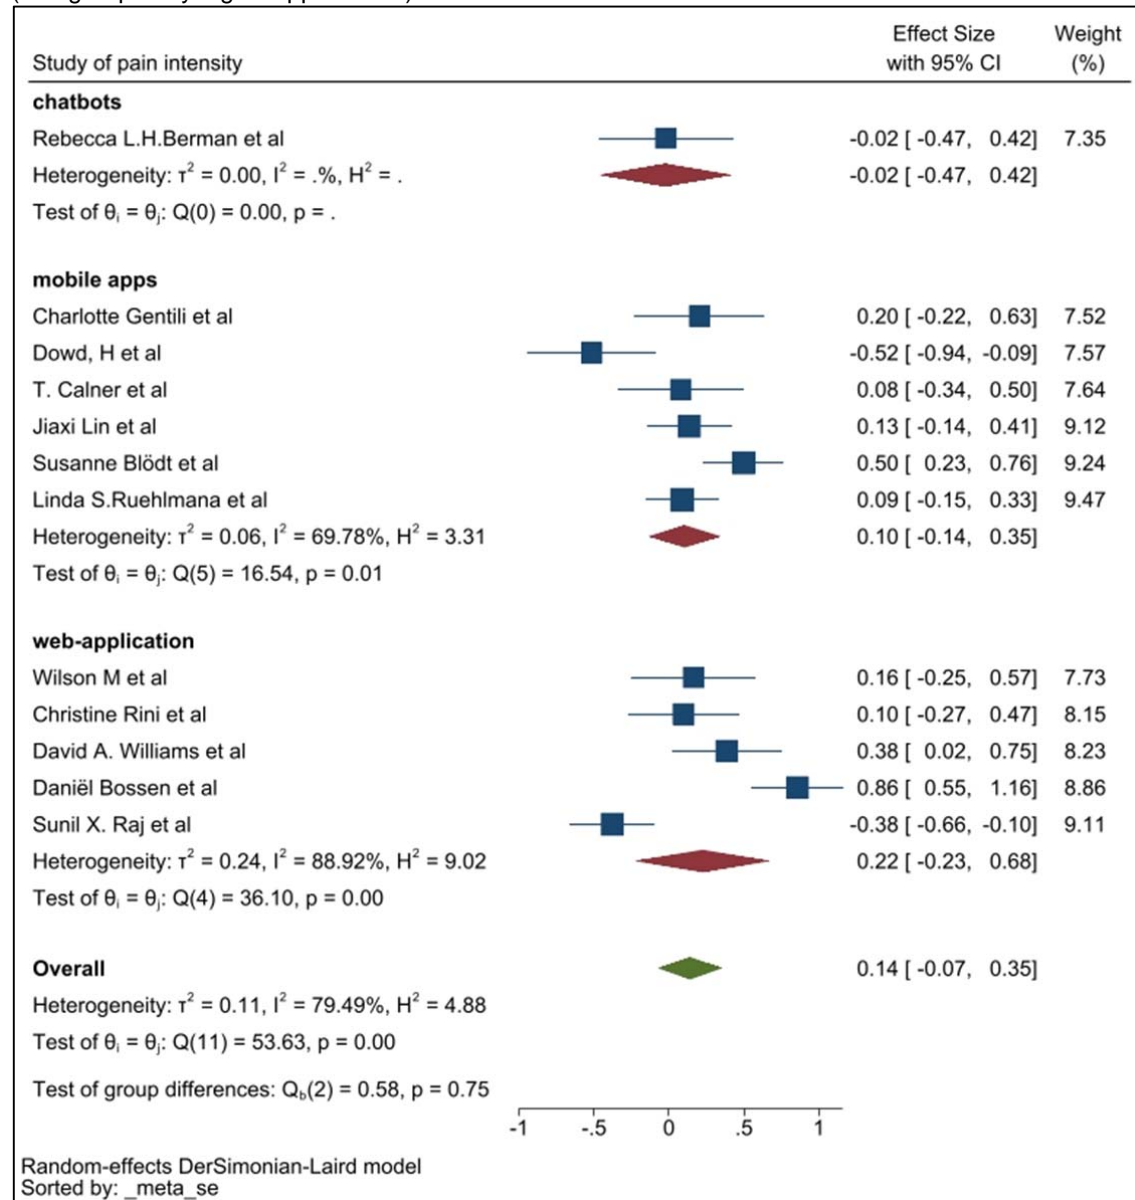

Figure 17. (a) funnel plot for pain intensity; (b) egger's test for pain intensity.

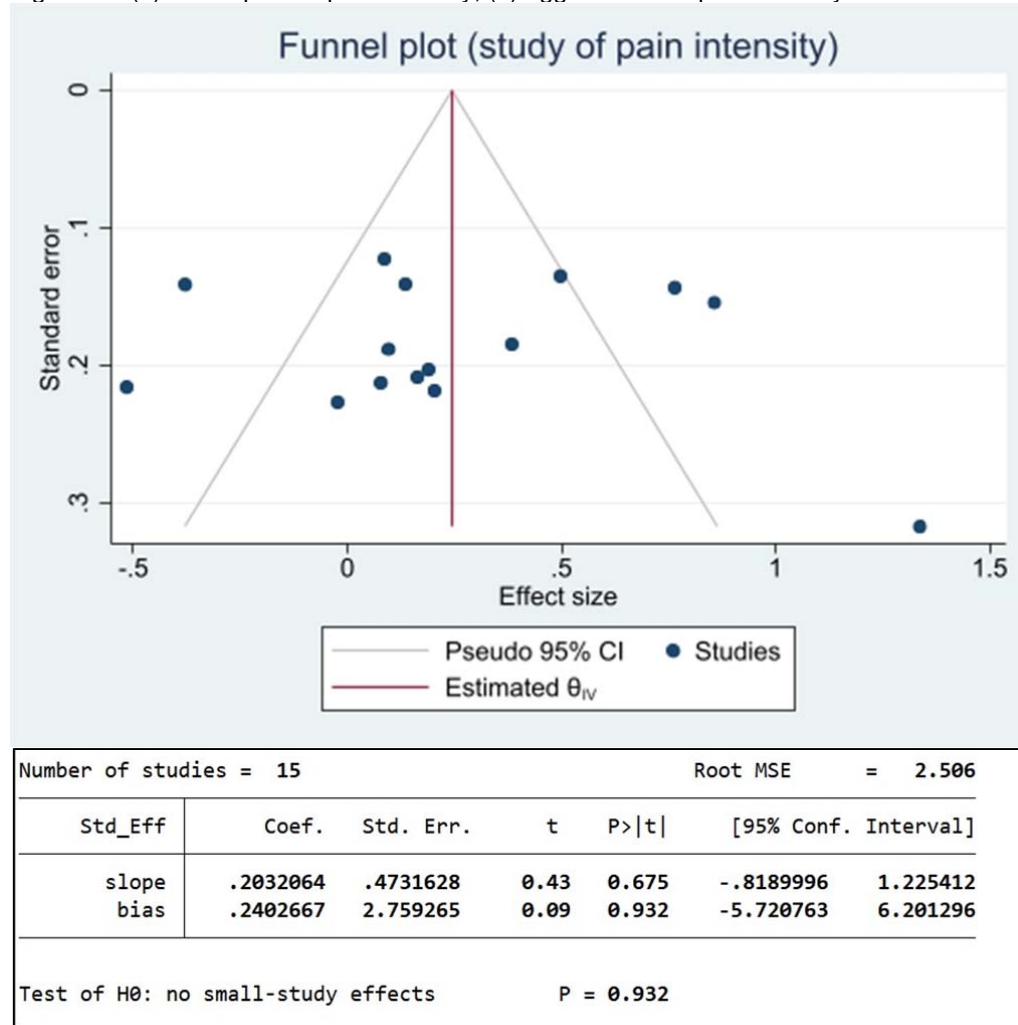



Figure 18. (a) funnel plot for depression; (b) egger's test for depression.

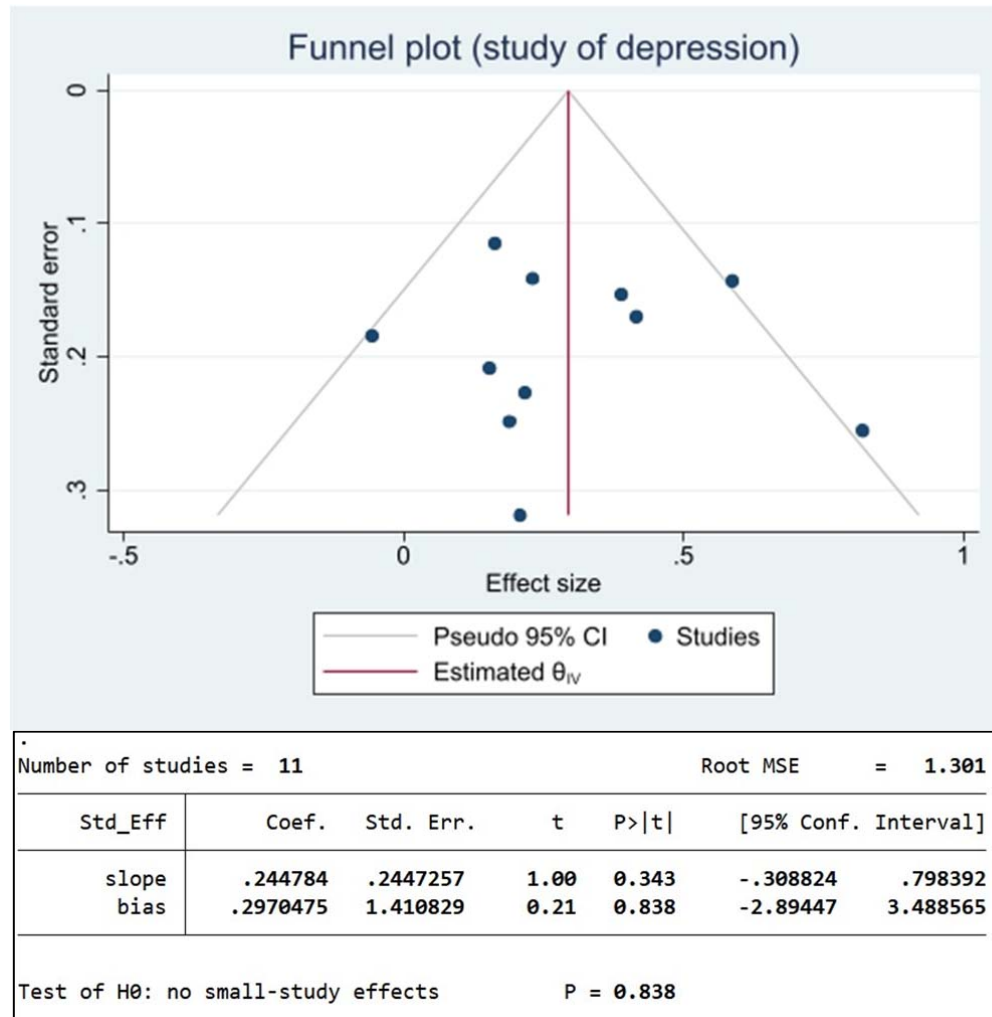

Figure 19. (a) funnel plot for anxiety; (b) egger's test for anxiety.

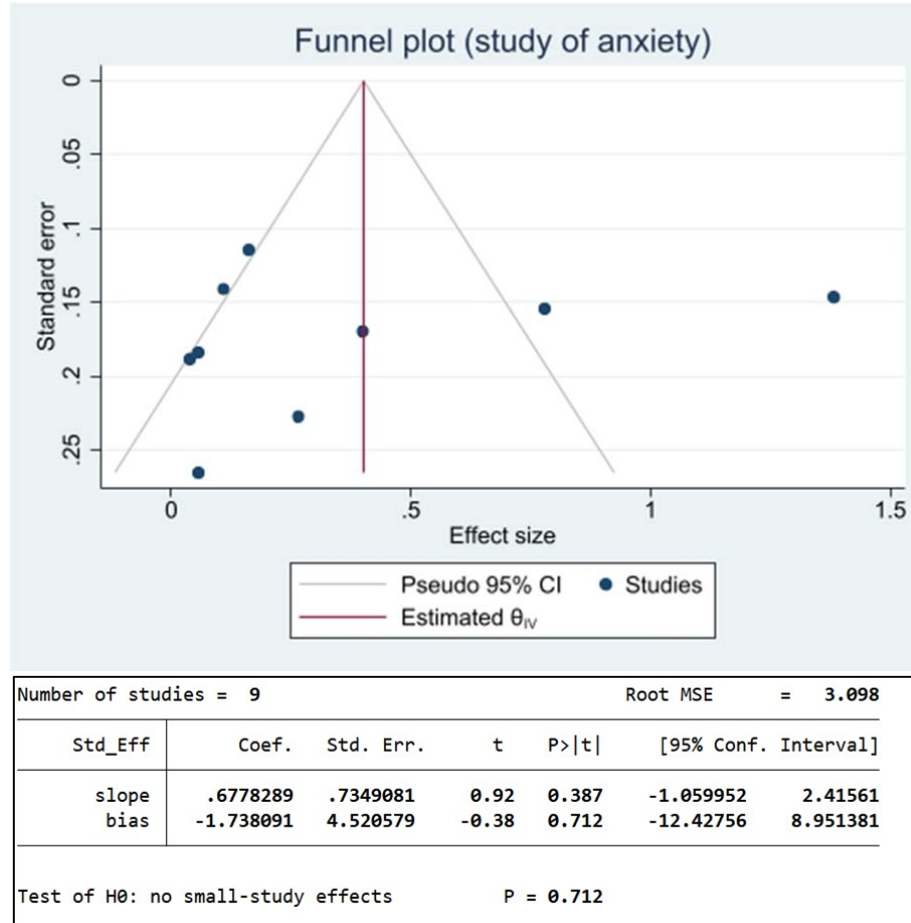

Figure 20. Funnel plot for pain inferences

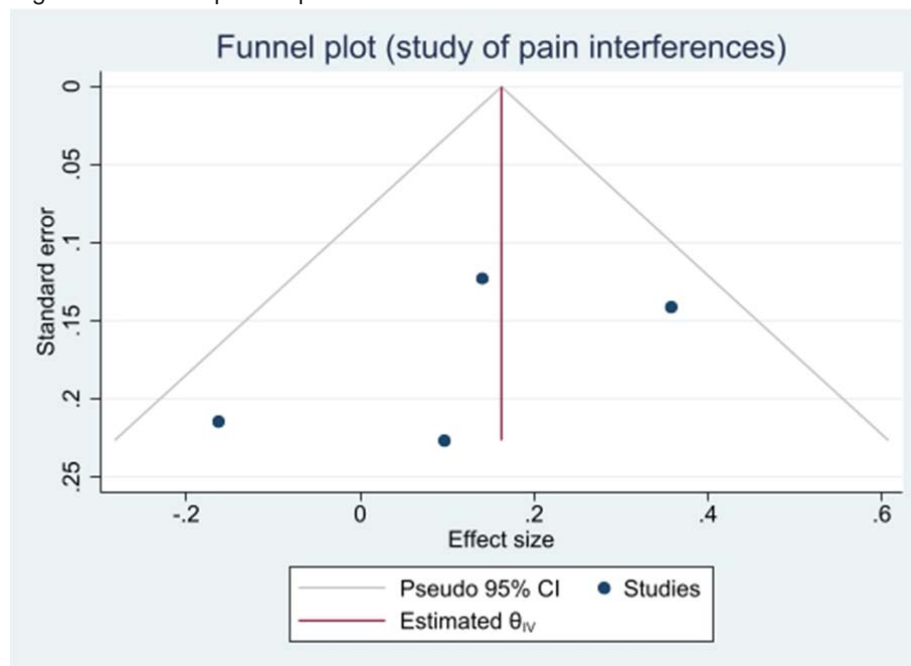



Figure 1. Chronic Pain Classification Tree (CPCT)

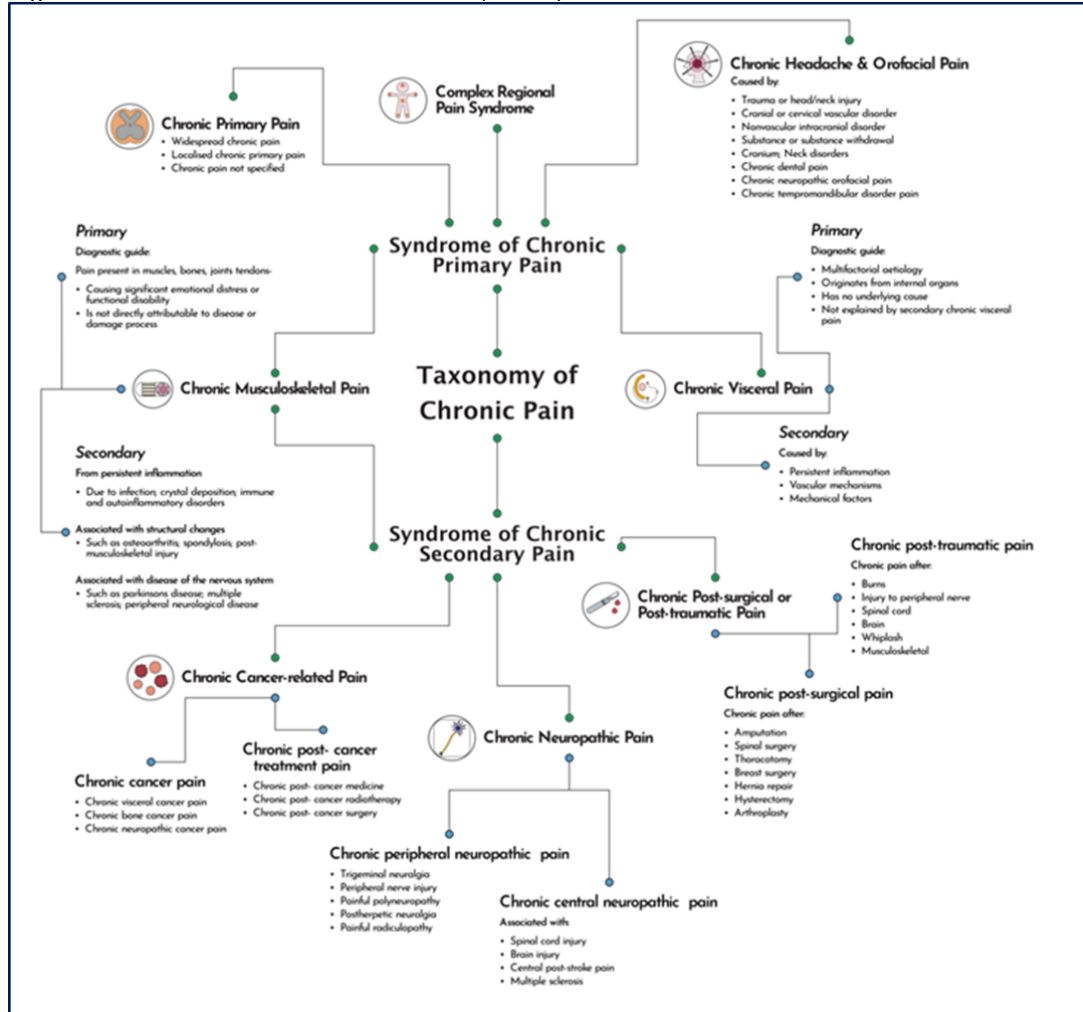

Figure 2. Acute Pain Classification Tree

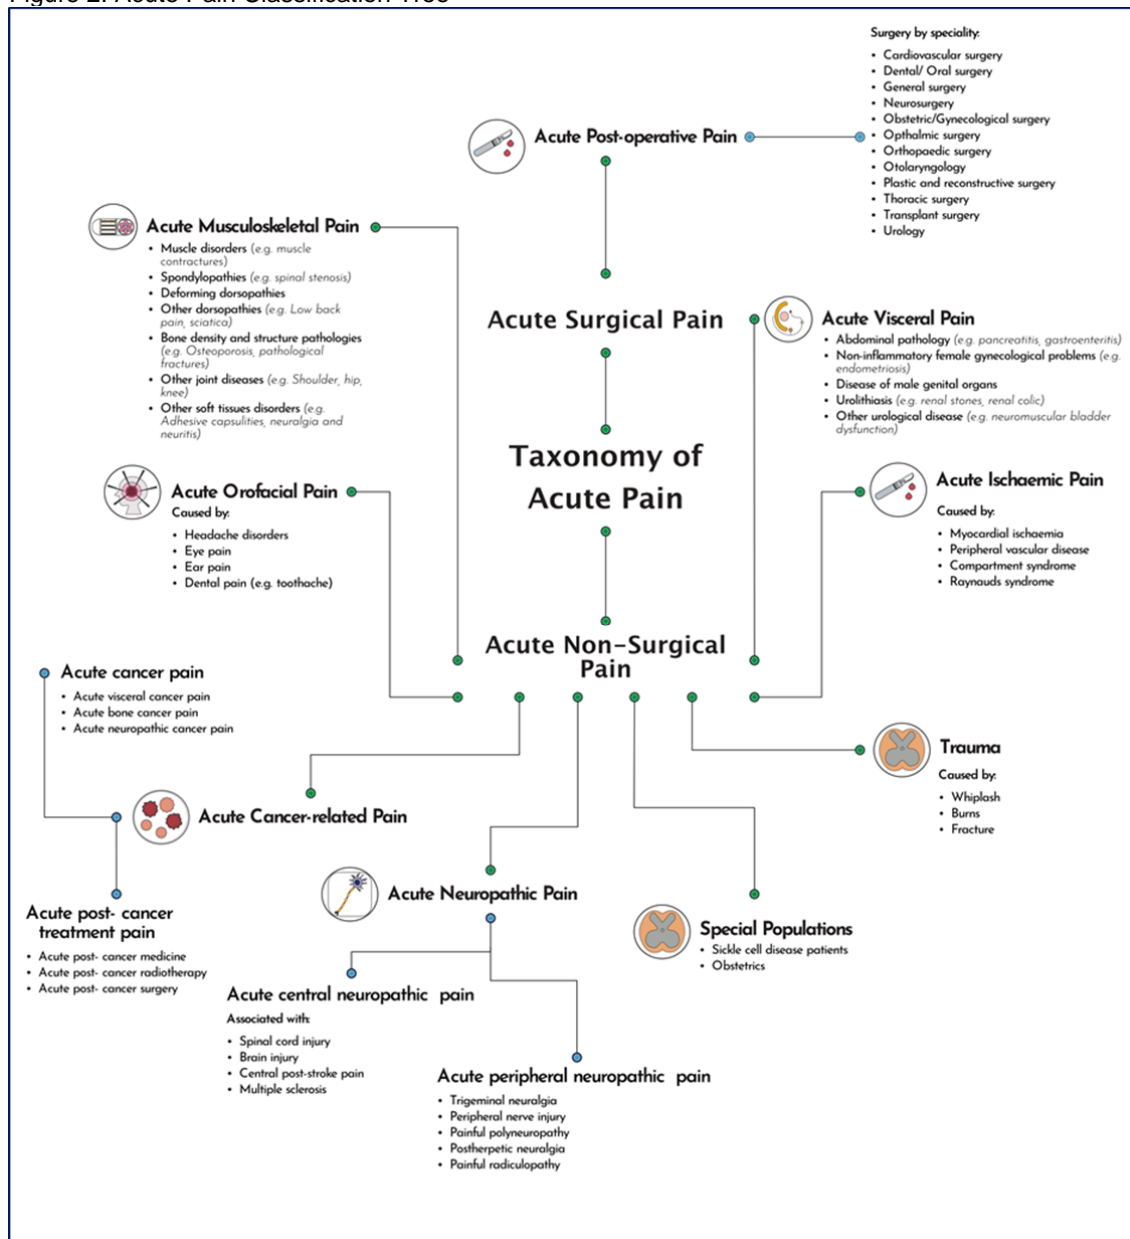

Source: https://medrxiv.org/content/10.1101/2022.03.02.22271773v1.full.pdf
